# Supplementary material for: Fermentation characteristics of bedded pack barn dairy cattle manure on methane yield, carbon, and nitrogen content in solid-state anaerobic digestion
Source: PeerJ. 2022 Oct 14;10:e14134. doi: 10.7717/peerj.14134 (PMC9575680; doi:10.7717/peerj.14134)
Supplement: Supplemental Information 2 [file peerj-10-14134-s002.xlsx]

## Sheet: CH4, METHANE CONTENT (Outlier)
																											Outlier
																																												IQR test
		0	0	0	0	0	0	0	0	0	0	0	0	0	0	0	0	0	0	0	0	0	0	0	0	0	0	0	0	0	0	0		0	0	0	0	0	0	0		0
Cumulitive mehtane production		3	1.1089	1.0205	1.57122	1.61717	1.55158	0.84358	1.32161	1.17389	1.96215	1.11628	1.01292	1.87822		1.4424		0.531682	1.03839	2.04135	0.926683	1.0997	0.236835	0.124838	1.54904	1.94055	1.35303	1.45292	2.5691	1.31226	1.17519	0.518172		3	0.0078121	0.00640683	0.00413852	0.0175299	0.0186277	5.43675e-06		0.00908674		0.881721	1.20946	0.218491	1.42795	1.75569
		6				2.69952	3.70549	2.77617	1.42645	3.20113	3.83776	3.15255	2.97801	3.46458	1.47017	3.6689	2.46049	5.09067	2.80574	4.01122	2.97016	2.97596	2.71785	2.14012	1.83092	1.91346	1.52177	3.95187	2.75265	3.23448	2.91863	3.85081		6	0.209683	0.116649	0.109513	0.279279	0.300889	0.00598387		0.170333		1.44026	2.79414	0.902585	3.69673	5.0506
		9							1.76629	4.34918	4.3954	3.37161	4.49746	3.75883	2.9859	5.08014	4.12147	5.39388	3.73681	5.55033	3.60393	4.32391	4.43439	2.24072	2.86559	3.39611	2.0409	5.52948	4.3334	4.83496	4.18729	4.85927		9	1.82906	0.909743	1.03586	1.90357	2.03618	0.344836		1.34321		3.27976	4.22382	0.629374	4.85319	5.79726
		12							2.64081	5.33632	5.40807	4.5185	5.68379	5.56387	4.17134	6.04271	4.9057	6.77223	4.95586	6.40678	4.86142	5.60087	5.45876	3.66452	4.08371	4.38097	2.01273	6.58491	4.3203	6.22556	5.68142	5.77815		12	7.61255	3.89345	4.83808	7.20209	7.57782	3.60361		5.78793		2.48088	4.66058	1.45313	6.11371	8.29341
		15										8.85216	11.5645	13.4856	10.4182	13.995	6.02442	7.37322	5.55146	12.2283	13.1986	14.2532	5.76666	3.63884	10.7967	12.5568	23.0288	12.9416	9.98257	13.8169	13.138	11.4422		15	19.4651	10.8961	13.9259	18.1181	18.6981	14.0168		15.8533		9.07186	11.8171	1.83013	13.6472	16.3924
		18										25.5613	25.9201	27.877	32.3535	35.1967	6.4829	10.213	9.48264	25.1206	36.5662	34.2433	6.94962	22.9901	27.5755	30.3959	36.7199	17.6692	28.8586	36.5021	36.129	30.7156		18	36.115	22.5752	28.7591	34.3467	34.7845	30.7692		31.2249		18.6938	29.3228	7.08602	36.4088	47.0379
		21													50.901	53.0476	6.98898	11.1017	12.3928	41.4081	53.5264	52.0973	8.52812	42.2756	46.7339	48.218	55.6826	34.4597	47.5147	54.3624	55.0795	48.3739		21	54.2517	37.806	47.2949	53.514	53.293	48.5032		49.1105		36.9735	47.7295	7.17066	54.9002	65.6562
		24													68.3868	77.9281	8.05182	11.6466	17.0389	58.8464	65.1116	71.8534	9.5298	55.4582	67.0016	67.1901	66.417	54.1713	66.8667	71.9282	73.2182	63.9388		24	70.9191	54.4585	66.5281	72.7754	71.4518	63.1221		66.5425		55.4015	64.5583	6.10452	70.6628	79.8196
		27																13.7741	24.7499	80.1225	87.8568	93.1125	10.8853	74.7839	89.3172	88.6623	87.1252	75.2799	87.6463	91.5997	90.8722	77.4874		27	84.5987	70.5116	84.0729	90.0643	87.4045	73.5203		81.6954		64.6435	79.8969	10.1689	90.0658	105.319
		30																14.2008	30.4203	94.8525	101.686	103.088	11.6514	83.0152	103.771	103.76	95.1392	90.0882	101.462	105.873	100.207	78.5884		30	95.0156	84.6596	98.7148	104.407	100.389	80.3048		93.9152		76.6544	91.3509	9.79771	101.149	115.845
		33																			111.541	110.132	12.2885	92.3225	112.82	112.995	102.591	96.2124	108.236	115.122	108.375	82.5002		33	102.564	96.3584	110.207	115.671	110.415	84.5144		103.288		82.0076	97.807	10.5329	108.34	124.139
		36																			118.402	115.661	12.7441	100.48	119.213	119.919	107.229	103.326	115.927	122.86	115.326	84.4254		36	107.859	105.604	118.855	124.186	117.88	87.0513		110.239		87.0887	104.301	11.4751	115.776	132.989
		39																						106.701	124.459	125.834	111.169	108.4	122.252	129.372	120.915	88.2472		39	111.493	112.679	125.177	130.455	123.302	88.5543		115.277		89.8542	109.092	12.8253	121.918	141.155
		42																						111.197	130.651	129.91	113.464	114.871	127.841	133.839	125.368	88.5746		42	113.952	117.972	129.706	134.986	127.171	89.4362		118.871		93.7053	113.816	13.4071	127.223	147.334
		45																						114.655	134.966	133.02	116.011	121.193	132.28	137.828	129.471	88.9395		45	115.6	121.868	132.907	138.219	129.901	89.9507		121.408		95.8998	117.307	14.2712	131.578	152.984
		48																						116.208	136.834	134.92	116.768	125.326	135.334	140.378	131.601	89.3093		48	116.699	124.704	135.149	140.506	131.812	90.2498		123.186		95.6661	118.907	15.494	134.401	157.642
		51																									117.434	127.685	137.162	141.731	132.917	89.7297		51	117.428	126.75	136.708	142.114	133.141	90.4234		124.427		95.8417	119.997	16.1036	136.101	160.256
		54																									117.762	129.256	138.716	142.855	133.311	89.8762		54	117.91	128.219	137.788	143.24	134.062	90.5241		125.29		95.5424	120.636	16.7289	137.365	162.458
		57																									118.447	130.353	139.931	143.918	134.567	90.7456		57	118.228	129.269	138.534	144.025	134.699	90.5824		125.89		95.6742	121.424	17.1663	138.59	164.339
		60																									118.938	131.061	141.165	144.88	135.398	91.3156		60	118.439	130.018	139.048	144.572	135.138	90.6161		126.305		95.3372	121.969	17.7545	139.724	166.355
		63																												145.154	136.071	91.6551		63	118.577	130.55	139.401	144.953	135.441	90.6357		126.593		73.7384	113.863	26.7496	140.612	180.737
		66																												145.886	137.039	91.9616		66	118.669	130.929	139.644	145.217	135.65	90.647		126.793		74.0574	114.5	26.962	141.462	181.905
		69																												146.124	137.378	92.2406		69	118.729	131.197	139.811	145.401	135.793	90.6536		126.931		74.3969	114.809	26.9417	141.751	182.163
		72																												146.732	138.232	92.8195		72	118.768	131.387	139.926	145.528	135.892	90.6574		127.027		75.0914	115.526	26.9563	142.482	182.917
																																		P	118.845	131.849	140.177	145.817	136.109	90.6626
																																		Rm	6.09169	5.58685	6.47969	6.54959	6.25908	6.0783
																																		ㅅ	12.0781	14.2498	13.7018	12.8294	12.4851	12.9383
																																		SUMXMY2	77.9474	175.323	93.1764	56.6224	98.3892	91.2327
Daily methane production		0	0	0	0	0	0	0	0	0	0	0	0	0	0	0	0	0	0	0	0	0	0	0	0	0	0	0	0	0	0	0		0	0	0	0	0	0	0
		3	1.1089	1.0205	1.57122	1.61717	1.55158	0.84358	1.32161	1.17389	1.96215	1.11628	1.01292	1.87822	0	1.4424	0	0.531682	1.03839	2.04135	0.926683	1.0997	0.236835	0.124838	1.54904	1.94055	1.35303	1.45292	2.5691	1.31226	1.17519	0.518172		3	9.19395e-05	0.0102642	0.588735	0.0157136	0.00140919	3.90204e-31
		6				1.08236	2.15391	1.93259	0.104844	2.02724	1.87562	2.03626	1.96509	1.58636	1.47017	2.2265	2.46049	4.55899	1.76735	1.96987	2.04347	1.87626	2.48102	2.01528	0.281877	-0.027093	0.168735	2.49895	0.183545	1.92222	1.74343	3.33264		6	0.00396702	0.0875684	1.15235	0.0810229	0.0145985	4.97071e-24
		9							0.339842	1.14805	0.557632	0.219059	1.51945	0.294246	1.51573	1.41124	1.66098	0.303213	0.931072	1.53911	0.633769	1.34795	1.71653	0.100602	1.03467	1.48265	0.519133	1.57761	1.58075	1.60048	1.26867	1.00846		9	0.0861471	0.522347	2.05515	0.333076	0.109175	8.01003e-18
		12							0.874511	0.987141	1.01268	1.1469	1.18633	1.80504	1.18544	0.962569	0.784223	1.37835	1.21904	0.856447	1.25749	1.27696	1.02438	1.42381	1.21812	0.984866	-0.028178	1.05543	-0.013104	1.3906	1.49413	0.918879		12	0.941524	2.17851	3.33962	1.09165	0.58941	1.63282e-12
		15										4.33365	5.88073	7.92174	6.24688	7.95226	1.11872	0.600994	0.595606	5.82154	8.3372	8.65234	0.30789	-0.025681	6.71296	8.1758	21.0161	6.35669	5.66227	7.59136	7.45653	5.66405		15	5.17889	6.35253	4.94478	2.85254	2.29715	4.21051e-08
		18										16.7092	14.3555	14.3914	21.9353	21.2018	0.458488	2.83978	3.93118	12.8923	23.3676	19.9901	1.18297	19.3512	16.7788	17.8392	13.691	4.72759	18.876	22.6852	22.9911	19.2734		18	14.3369	12.9516	6.671	5.94267	6.46305	0.000137347
		21													18.5476	17.8509	0.506075	0.88874	2.91016	16.2875	16.9602	17.854	1.5785	19.2856	19.1584	17.822	18.9627	16.7905	18.6562	17.8603	18.9504	17.6583		21	19.9751	18.4623	8.20032	9.87045	13.127	0.056675
		24													17.4858	24.8804	1.06285	0.54484	4.64612	17.4383	11.5852	19.7562	1.00167	13.1826	20.2677	18.9721	10.7344	19.7115	19.352	17.5658	18.1387	15.5648		24	14.0067	18.4009	9.18471	13.0706	19.2473	2.95839
		27																2.12755	7.711	21.2761	22.7452	21.259	1.35551	19.3257	22.3156	21.4722	20.7082	21.1087	20.7796	19.6715	17.6541	13.5487		27	4.94309	12.8227	9.37335	13.7995	20.3728	19.5347
		30																0.42663	5.67043	14.73	13.8287	9.97602	0.76604	8.2313	14.4538	15.0974	8.01398	14.8083	13.8161	14.2737	9.33515	1.10098		30	0.877961	6.24751	8.71605	11.6153	15.5672	16.3173
		33																			9.8552	7.044	0.63711	9.30727	9.0491	9.2351	7.45135	6.12423	6.7731	9.2487	8.1672	3.91185		33	0.0784812	2.12825	7.38482	7.79481	8.58716	1.72417
		36																			6.8611	5.5283	0.45568	8.15702	6.3929	6.9246	4.6384	7.11306	7.6912	7.7381	6.9511	1.92512		36	0.00353078	0.506907	5.70105	4.17047	3.41952	0.0230463
		39																						6.2217	5.2461	5.9143	3.9404	5.0743	6.3251	6.5121	5.5889	3.82187		39	7.99446e-05	0.0844152	4.01019	1.77897	0.983012	3.89683e-05
		42																						4.4959	6.1924	4.0766	2.2951	6.4709	5.5897	4.4672	4.4533	0.32732		42	9.11009e-07	0.00982881	2.57022	0.605002	0.204	8.3351e-09
		45																						3.4579	4.315	3.1099	2.5466	6.3224	4.4385	3.9887	4.1028	0.36492		45	5.22481e-09	0.000800147	1.50096	0.16404	0.0305618	2.25528e-13
		48																						1.5528	1.8674	1.8999	0.7566	4.1327	3.0545	2.5495	2.1305	0.36981		48	1.50811e-11	4.55435e-05	0.798667	0.0354607	0.00330526	7.7193e-19
		51																									0.6667	2.3595	1.8274	1.3533	1.3156	0.42042		51	2.19083e-14	1.81247e-06	0.387219	0.00611154	0.000258054	3.3423e-25
		54																									0.3281	1.5705	1.5541	1.1235	0.3938	0.14649		54	1.60176e-17	5.04318e-08	0.171057	0.000839765	1.45443e-05	1.83064e-32
		57																									0.6846	1.0977	1.2148	1.0635	1.2566	0.86938		57	5.89391e-21	9.81128e-10	0.0688529	9.19962e-05	5.91771e-07	1.26838e-40
		60																									0.4914	0.7072	1.2346	0.962	0.8307	0.56998		60	1.0915e-24	1.33455e-11	0.0252521	8.03502e-06	1.73817e-08	1.1117e-49
		63																												0.2743	0.6726	0.33952		63	1.01731e-28	1.26921e-13	0.00843857	5.59511e-07	3.6856e-10	1.23257e-59
		66																												0.7312	0.9686	0.30649		66	4.77202e-33	8.43951e-16	0.00256942	3.10624e-08	5.64159e-12	1.72873e-70
		69																												0.2384	0.339	0.27902		69	1.12659e-37	3.92365e-18	0.000712847	1.37488e-09	6.23409e-14	3.06712e-82
		72																												0.6082	0.8541	0.57893		72	1.33857e-42	1.27542e-20	0.000180199	4.85178e-11	4.97305e-16	6.88375e-95
																																		A	19.9771	19.2751	9.40796	13.9059	20.7278	23.3007
																																		B	20.9491	22.4721	26.1556	26.2185	26.0232	28.2389
																																		C	3.62051	5.015	9.8355	6.3027	5.25534	2.0864
																											USE							SUMXMY2	670.368	417.396	573.905	514.404	467.113	1178.18
		0
		3																			100	100	100	100	100	100	100	100	100	100	100	100
		6																			68.8002	63.0472	91.286	94.1668	15.3954	-1.41592	11.0881	63.2346	6.66795	59.4291	59.7348	86.5438
		9																			17.5855	31.1744	38.7096	4.48972	36.1067	43.6573	25.4364	28.531	36.4784	33.1023	30.298	20.7534
		12																			25.8668	22.7992	18.7657	38.8538	29.8288	22.4805	-1.39999	16.028	-0.303313	22.337	26.2986	15.9027
		15																			63.1672	60.7045	5.33914	-0.705746	62.1762	65.1107	91.26	49.1183	56.7216	54.9425	56.7556	49.5014
		18																			63.9049	58.3766	17.022	84.1721	60.8468	58.6893	37.2851	26.7561	65.4086	62.1476	63.636	62.7479
		21																			31.6856	34.2705	18.5094	45.6187	40.9948	36.9614	34.055	48.7251	39.264	32.8541	34.4056	36.5038
		24																			17.7929	27.4951	10.511	23.7703	30.2496	28.2365	16.1622	36.3875	28.9412	24.4213	24.7735	24.3433
		27																			25.8889	22.8316	12.4527	25.8421	24.9846	24.218	23.7683	28.0402	23.7084	21.4755	19.4273	17.485
		30																			13.5994	9.67714	6.57469	9.91541	13.9285	14.5504	8.42343	16.4375	13.6169	13.4818	9.31583	1.40094
		33																			8.83552	6.39593	5.18462	10.0813	8.02082	8.17303	7.2632	6.36532	6.25774	8.03382	7.53608	4.74162
		36																			5.79476	4.77975	3.5756	8.11809	5.36259	5.77438	4.3257	6.88413	6.63454	6.2983	6.02736	2.28026
		39																						5.83096	4.21512	4.70009	3.5445	4.6811	5.17383	5.03361	4.62219	4.33087
		42																						4.04318	4.73963	3.13801	2.02275	5.6332	4.37237	3.33773	3.55219	0.369542
		45																						3.01592	3.19709	2.33792	2.19514	5.2168	3.35538	2.89397	3.1689	0.410301
		48																						1.33623	1.36472	1.40817	0.647954	3.29757	2.257	1.81617	1.61891	0.414078
		51																									0.567722	1.8479	1.33229	0.954837	0.989792	0.46854
		54																									0.278612	1.21503	1.12035	0.786465	0.2954	0.162991
		57																									0.57798	0.842095	0.868143	0.738962	0.933809	0.958041
		60																									0.413155	0.539597	0.874577	0.663998	0.613525	0.624187
		63																												0.188971	0.494303	0.370432
		66																												0.501215	0.706806	0.333281
		69																												0.163149	0.246764	0.302492
		72																												0.414497	0.617873	0.623716

## Sheet: CH4, METHANE CONTENT (Modified)
																																Removed line
																																																Day	Daily methane production
		0	0	0	0	0	0	0	0	0	0	0	0	0	0	0	0	0	0	0	0	0	0	0	0	0	0	0	0	0	0			0	0	0	0	0	0					0		0		0	0
Cumulitive mehtane production		3	1.1089	1.0205	1.57122	1.61717	1.55158	0.84358	1.32161	1.17389	1.96215	1.11628	1.01292	1.87822		1.4424		0.531682	1.03839	2.04135	0.926683	1.0997	0.236835	0.124838	1.54904	1.94055	1.35303	1.45292		1.31226	1.17519			3	0.0269074	0.00640682	0.00413103	0.0175299	0.0186277					1.32335	±	0.1151		3	1.21111
		6				2.69952	3.70549	2.77617	1.42645	3.20113	3.83776	3.15255	2.97801	3.46458	1.47017	3.6689	2.46049	5.09067	2.80574	4.01122	2.97016	2.97596	2.71785	2.14012	1.83092	1.91346	1.52177	3.95187	2.75265	3.23448	2.91863			6	0.421535	0.116649	0.109397	0.279279	0.300889					2.87588	±	0.885575		6	1.69846
		9							1.76629	4.34918	4.3954	3.37161	4.49746	3.75883	2.9859	5.08014	4.12147	5.39388	3.73681	5.55033	3.60393	4.32391	4.43439	2.24072	2.86559	3.39611		5.52948	4.3334	4.83496	4.18729			9	2.68091	0.909743	1.03525	1.90357	2.03618					4.72128	±	0.606		9	1.00217
		12							2.64081	5.33632	5.40807	4.5185	5.68379	5.56387	4.17134	6.04271	4.9057	6.77223	4.95586	6.40678	4.86142	5.60087	5.45876	3.66452	4.08371	4.38097		6.58491	4.3203	6.22556	5.68142			12	9.30022	3.89345	4.83652	7.20209	7.57782					5.70305	±	0.993843		12	1.02435
		15										8.85216	11.5645	13.4856	10.4182	13.995	6.02442	7.37322	5.55146	12.2283	13.1986	14.2532	5.76666	3.63884	10.7967	12.5568	23.0288	12.9416	9.98257	13.8169	13.138			15	21.4641	10.8961	13.9236	18.1181	18.6981					14.5816	±	4.94634		15	5.4735
		18										25.5613	25.9201	27.877	32.3535	35.1967	6.4829	10.213	9.48264	25.1206	36.5662	34.2433	6.94962	22.9901	27.5755	30.3959	36.7199	17.6692	28.8586	36.5021	36.129			18	37.664	22.5752	28.757	34.3467	34.7845					31.1757	±	8.2377		18	13.7275
		21													50.901	53.0476	6.98898	11.1017	12.3928	41.4081	53.5264	52.0973	8.52812	42.2756	46.7339	48.218	55.6826	34.4597	47.5147	54.3624	55.0795			21	54.9703	37.806	47.2938	53.514	53.293					49.4198	±	8.98773		21	12.9524
		24													68.3868	77.9281	8.05182	11.6466	17.0389	58.8464	65.1116	71.8534	9.5298	55.4582	67.0016	67.1901	66.417	54.1713	66.8667	71.9282	73.2182			24	70.8813	54.4585	66.5281	72.7754	71.4518					66.5203	±	7.52889		24	12.7859
		27																13.7741	24.7499	80.1225	87.8568	93.1125	10.8853	74.7839	89.3172	88.6623	87.1252	75.2799	87.6463	91.5997	90.8722			27	84.0935	70.5116	84.0737	90.0643	87.4045					86.5047	±	6.57112		27	16.6843
		30																14.2008	30.4203	94.8525	101.686	103.088	11.6514	83.0152	103.771	103.76	95.1392	90.0882	101.462	105.873	100.207			30	94.335	84.6596	98.7162	104.407	100.389					98.5541	±	6.08475		30	9.49714
		33																			111.541	110.132	12.2885	92.3225	112.82	112.995	102.591	96.2124	108.236	115.122	108.375			33	101.913	96.3584	110.209	115.671	110.415					106.107	±	7.09247		33	6.84636
		36																			118.402	115.661	12.7441	100.48	119.213	119.919	107.229	103.326	115.927	122.86	115.326			36	107.348	105.604	118.857	124.186	117.88					112.933	±	7.71488		36	5.65182
		39																						106.701	124.459	125.834	111.169	108.4	122.252	129.372	120.915			39	111.164	112.679	125.177	130.455	123.302					118.422	±	8.57082		39	5.1025
		42																						111.197	130.651	129.91	113.464	114.871	127.841	133.839	125.368			42	113.806	117.972	129.706	134.986	127.171					123.077	±	8.71099		42	3.8375
		45																						114.655	134.966	133.02	116.011	121.193	132.28	137.828	129.471			45	115.617	121.868	132.907	138.219	129.901					127.357	±	8.7332		45	3.36625
		48																						116.208	136.834	134.92	116.768	125.326	135.334	140.378	131.601			48	116.852	124.704	135.148	140.506	131.812					129.881	±	9.15958		48	1.94375
		51																									117.434	127.685	137.162	141.731	132.917			51	117.689	126.75	136.708	142.114	133.141					131.386	±	9.36841		51	1.018
		54																									117.762	129.256	138.716	142.855	133.311			54	118.255	128.219	137.787	143.24	134.062					132.38	±	9.67162		54	0.642
		57																									118.447	130.353	139.931	143.918	134.567			57	118.637	129.269	138.533	144.025	134.699					133.443	±	9.84259		57	0.93
		60																									118.938	131.061	141.165	144.88	135.398			60	118.895	130.018	139.047	144.572	135.138					134.288	±	10.084		60	0.744
		63																												145.154	136.071			63	119.069	130.55	139.4	144.953	135.441					140.612	±	6.42322		63	0.28
		66																												145.886	137.039			66	119.185	130.929	139.643	145.217	135.65					141.462	±	6.25535		66	0.475
		69																												146.124	137.378			69	119.264	131.197	139.81	145.401	135.793		average	sd		141.751	±	6.18421		69	0.235
		72																												146.732	138.232			72	119.317	131.387	139.925	145.528	135.892		142.482	6.01034		142.482	±	6.01034		72	0.54
																																		P	119.426	131.849	140.175	145.817	136.109		134.675	9.96215
																																		Rm	5.81331	5.58685	6.48008	6.54959	6.25908		6.13778	0.421392
																																		ㅅ	11.5249	14.2498	13.7024	12.8294	12.4851		12.9583	1.06264
																																		SUMXMY2	37.6804	175.323	86.5974	56.6224	98.3892
Daily methane production		0	0	0	0	0	0	0	0	0	0	0	0	0	0	0	0	0	0	0	0	0	0	0	0	0	0	0	0	0	0			0	0	0	0	0	0					0	±	0
		3	1.1089	1.0205	1.57122	1.61717	1.55158	0.84358	1.32161	1.17389	1.96215	1.11628	1.01292	1.87822	0	1.4424	0	0.531682	1.03839	2.04135	0.926683	1.0997	0.236835	0.124838	1.54904	1.94055	1.35303	1.45292		1.31226	1.17519			3	1.31393	0.0426948	0.268712	0.649755	0.410456					1.32335	±	0.1151
		6				1.08236	2.15391	1.93259	0.104844	2.02724	1.87562	2.03626	1.96509	1.58636	1.47017	2.2265	2.46049	4.55899	1.76735	1.96987	2.04347	1.87626	2.48102	2.01528	0.281877	-0.027093	0.168735	2.49895	2.75265	1.92222	1.74343			6	2.85757	0.191768	0.823634	1.57902	1.19012					1.8172	±	1.00918
		9							0.339842	1.14805	0.557632	0.219059	1.51945	0.294246	1.51573	1.41124	1.66098	0.303213	0.931072	1.53911	0.633769	1.34795	1.71653	0.100602	1.03467	1.48265	-1.52177	1.57761	1.58075	1.60048	1.26867			9	5.42724	0.697461	2.13566	3.35777	2.91067					0.90115	±	1.36145
		12							0.874511	0.987141	1.01268	1.1469	1.18633	1.80504	1.18544	0.962569	0.784223	1.37835	1.21904	0.856447	1.25749	1.27696	1.02438	1.42381	1.21812	0.984866	.	1.05543	-0.013104	1.3906	1.49413			12	9.00161	2.05404	4.6847	6.24798	6.00442					0.981764	±	0.689168
		15										4.33365	5.88073	7.92174	6.24688	7.95226	1.11872	0.600994	0.595606	5.82154	8.3372	8.65234	0.30789	-0.025681	6.71296	8.1758	23.0288	6.35669	5.66227	7.59136	7.45653			15	13.0382	4.89829	8.69324	10.1731	10.4478					10.0191	±	7.31623
		18										16.7092	14.3555	14.3914	21.9353	21.2018	0.458488	2.83978	3.93118	12.8923	23.3676	19.9901	1.18297	19.3512	16.7788	17.8392	13.691	4.72759	18.876	22.6852	22.9911			18	16.4921	9.45852	13.6468	14.4941	15.3342					16.5942	±	7.62351
		21													18.5476	17.8509	0.506075	0.88874	2.91016	16.2875	16.9602	17.854	1.5785	19.2856	19.1584	17.822	18.9627	16.7905	18.6562	17.8603	18.9504			21	18.2176	14.7893	18.1231	18.0698	18.9832					18.244	±	0.928077
		24													17.4858	24.8804	1.06285	0.54484	4.64612	17.4383	11.5852	19.7562	1.00167	13.1826	20.2677	18.9721	10.7344	19.7115	19.352	17.5658	18.1387			24	17.5738	18.7248	20.3603	19.7125	19.8225					17.1005	±	3.66429
		27																2.12755	7.711	21.2761	22.7452	21.259	1.35551	19.3257	22.3156	21.4722	20.7082	21.1087	20.7796	19.6715	17.6541			27	14.8046	19.1968	19.3503	18.8172	17.4591					19.9844	±	1.40966
		30																0.42663	5.67043	14.73	13.8287	9.97602	0.76604	8.2313	14.4538	15.0974	8.01398	14.8083	13.8161	14.2737	9.33515			30	10.8914	15.9363	15.5575	15.7178	12.9707					12.0494	±	3.13575
		33																			9.8552	7.044	0.63711	9.30727	9.0491	9.2351	7.45135	6.12423	6.7731	9.2487	8.1672			33	6.99734	10.7125	10.5814	11.4883	8.12799					7.55292	±	1.21579
		36																			6.8611	5.5283	0.45568	8.15702	6.3929	6.9246	4.6384	7.11306	7.6912	7.7381	6.9511			36	3.92589	5.83095	6.08833	7.34753	4.29615					6.82637	±	1.27123
		39																						6.2217	5.2461	5.9143	3.9404	5.0743	6.3251	6.5121	5.5889			39	1.92354	2.56999	2.96349	4.11201	1.91537					5.48816	±	1.03994
		42																						4.4959	6.1924	4.0766	2.2951	6.4709	5.5897	4.4672	4.4533			42	0.823045	0.917211	1.22028	2.01368	0.720285					4.65524	±	1.56654
		45																						3.4579	4.315	3.1099	2.5466	6.3224	4.4385	3.9887	4.1028			45	0.307541	0.265064	0.425074	0.862886	0.228472					4.2798	±	1.35254
		48																						1.5528	1.8674	1.8999	0.7566	4.1327	3.0545	2.5495	2.1305			48	0.100356	0.0620267	0.125263	0.323549	0.0611276					2.52476	±	1.23981
		51																									0.6667	2.3595	1.8274	1.3533	1.3156			51	0.0285981	0.011753	0.0312269	0.106158	0.0137949					1.5045	±	0.631614
		54																									0.3281	1.5705	1.5541	1.1235	0.3938			54	0.00711691	0.0018033	0.00658548	0.0304782	0.00262591					0.994	±	0.605495
		57																									0.6846	1.0977	1.2148	1.0635	1.2566			57	0.00154669	0.000224041	0.00117489	0.00765687	0.000421616					1.06344	±	0.226337
		60																									0.4914	0.7072	1.2346	0.962	0.8307			60	0.000293544	2.2539e-05	0.000177319	0.00168321	5.70993e-05					0.84518	±	0.278255
		63																												0.2743	0.6726			63	4.86521e-05	1.83605e-06	2.26395e-05	0.00032378	6.52263e-06					0.47345	±	0.281641
		66																												0.7312	0.9686			66	7.04187e-06	1.2111e-07	2.44527e-06	5.44987e-05	6.28479e-07					0.8499	±	0.167867
		69																												0.2384	0.339			69	8.90087e-07	6.46877e-09	2.23428e-07	8.02689e-06	5.10784e-08		average	sd		0.2887	±	0.0711349
		72																												0.6082	0.8541			72	9.82505e-08	2.79774e-10	1.72703e-08	1.03451e-06	3.50155e-09		0.73115	0.173878		0.73115	±	0.173878
																																		A	18.2856	19.4947	20.4257	19.7428	19.9247		19.5747	0.797384
																																		B	21.7033	25.8539	24.5875	24.4554	23.2625		23.9725	1.56562
																																		C	8.15023	6.53033	7.33496	8.21094	7.2715		7.49959	0.697845
																											USE							SUMXMY2	267.252	166.249	149.776	145.963	167.722
		0
		3																			100	100	100	100	100	100	100	100	#DIV/0!	100	100	#DIV/0!
		6																			68.8002	63.0472	91.286	94.1668	15.3954	-1.41592	11.0881	63.2346	100	59.4291	59.7348	#DIV/0!		methane (daily max)	18.2176	19.1968	20.3603	19.7125	19.8225		19.4619	0.809084		Day	Daily methane production
		9																			17.5855	31.1744	38.7096	4.48972	36.1067	43.6573	#DIV/0!	28.531	36.4784	33.1023	30.298	#DIV/0!		date at max	21	27	24	24	24		24	2.12132		0	0	±	0
		12																			25.8668	22.7992	18.7657	38.8538	29.8288	22.4805	#VALUE!	16.028	-0.303313	22.337	26.2986	#DIV/0!												3	17.3064	±	6.43204
		15																			63.1672	60.7045	5.33914	-0.705746	62.1762	65.1107	100	49.1183	56.7216	54.9425	56.7556	#DIV/0!												6	32.2135	±	6.09019
		18																			63.9049	58.3766	17.022	84.1721	60.8468	58.6893	37.2851	26.7561	65.4086	62.1476	63.636	#DIV/0!												9	36.6165	±	7.47168
		21																			31.6856	34.2705	18.5094	45.6187	40.9948	36.9614	34.055	48.7251	39.264	32.8541	34.4056	#DIV/0!												12	41.4133	±	4.06511
		24																			17.7929	27.4951	10.511	23.7703	30.2496	28.2365	16.1622	36.3875	28.9412	24.4213	24.7735	#DIV/0!												15	54.9411	±	3.65436
		27																			25.8889	22.8316	12.4527	25.8421	24.9846	24.218	23.7683	28.0402	23.7084	21.4755	19.4273	#DIV/0!												18	63.0674	±	2.02003
		30																			13.5994	9.67714	6.57469	9.91541	13.9285	14.5504	8.42343	16.4375	13.6169	13.4818	9.31583	#DIV/0!												21	63.0484	±	1.461
		33																			8.83552	6.39593	5.18462	10.0813	8.02082	8.17303	7.2632	6.36532	6.25774	8.03382	7.53608	#DIV/0!												24	62.1533	±	3.82264
		36																			5.79476	4.77975	3.5756	8.11809	5.36259	5.77438	4.3257	6.88413	6.63454	6.2983	6.02736	#DIV/0!												27	62.2694	±	2.45505
		39																						5.83096	4.21512	4.70009	3.5445	4.6811	5.17383	5.03361	4.62219	#DIV/0!												30	63.6707	±	4.12574
		42																						4.04318	4.73963	3.13801	2.02275	5.6332	4.37237	3.33773	3.55219	#DIV/0!												33	59.4125	±	3.88465
		45																						3.01592	3.19709	2.33792	2.19514	5.2168	3.35538	2.89397	3.1689	#DIV/0!												36	59.3064	±	2.91402
		48																						1.33623	1.36472	1.40817	0.647954	3.29757	2.257	1.81617	1.61891	#DIV/0!												39	57.2448	±	1.3586
		51																									0.567722	1.8479	1.33229	0.954837	0.989792	#DIV/0!												42	57.3047	±	2.24499
		54																									0.278612	1.21503	1.12035	0.786465	0.2954	#DIV/0!												45	60.9093	±	2.54254
		57																									0.57798	0.842095	0.868143	0.738962	0.933809	#DIV/0!												48	61.5061	±	2.41878
		60																									0.413155	0.539597	0.874577	0.663998	0.613525	#DIV/0!												51	66.7884	±	7.05025
		63																												0.188971	0.494303	#DIV/0!												54	63.2835	±	7.63017
		66																												0.501215	0.706806	#DIV/0!												57	67.2652	±	3.64335
		69																												0.163149	0.246764	#DIV/0!												60	66.8144	±	5.93395
		72																												0.414497	0.617873	#DIV/0!												63	76.0666	±	7.29161
																																												66	66.2956	±	0.595054
																																												69	61.8833	±	13.4572
																																												72	66.6917	±	4.17073
[truncated: 8 more columns]
