# Supplementary material for: Fermentation characteristics of bedded pack barn dairy cattle manure on methane yield, carbon, and nitrogen content in solid-state anaerobic digestion
Source: PeerJ. 2022 Oct 14;10:e14134. doi: 10.7717/peerj.14134 (PMC9575680; doi:10.7717/peerj.14134)
Supplement: Supplemental Information 3 [file peerj-10-14134-s003.xlsx]

## Sheet: cellulose, hemi-, Lignin
		Time, days	Cellulose (% VS)			Hemicellulose (% VS)			Lignin (% VS)
		0	16.5358	16.4072	17.4091	15.1649	15.0173	15.9947	14.7552	14.3835	16.2936
		3	15.8988	17.0984	16.4851	14.8412	14.1767	14.5912	13.857	13.9852	13.7076
		6	16.2935	16.3093	17.1512	14.0373	13.7214	13.8894	15.5346	15.7276	14.7067
		12	16.4082	16.353	16.6284	12.9761	13.0608	13.1308	12.6663	14.7925	13.6919
		18	16.7049	16.5654	14.4198	13.489	13.2304	12.8667	14.382	14.838	25.3114
		24	13.4739	16.0441	15.2866	12.6557	13.1145	13.4624	23.16	23.8869	26.7691
		30	14.3924	14.4917	14.8198	13.1134	13.6713	12.7961	22.938	25.5804	17.2772
		36	14.5847	14.899	15.8979	10.9067	12.631	11.7232	16.0545	16.6131	16.6646
		48	14.5408	14.0793	14.4971	10.6505	9.12419	10.0548	16.8605	16.5643	16.5951
		60	12.9233	13.6914	14.5927	8.5418	8.69563	9.5481	23.4563	17.1713	18.7321
		72	14.2344	14.9079	15.6069	8.79705	9.49602	8.49547	18.1704	18.5312	18.5272
		Day	Cellulose (% VS)			Hemicellulose (% VS)			Lignin (% VS)
		0	16.784	±	0.545152	15.3923	±	0.526894	15.1441	±	1.01267
		3	16.4941	±	0.59984	14.5363	±	0.335654	13.8499	±	0.138905
		6	16.5846	±	0.490684	13.8827	±	0.158071	15.323	±	0.542343
		12	16.4632	±	0.145732	13.0559	±	0.0774715	13.7169	±	1.06332
		18	15.8967	±	1.2809	13.1954	±	0.312623	18.1771	±	6.18263
		24	14.9349	±	1.32068	13.0776	±	0.404625	24.6054	±	1.90881
		30	14.568	±	0.223673	13.1936	±	0.443054	21.9319	±	4.24207
		36	15.1272	±	0.68566	11.7536	±	0.862518	16.4441	±	0.338364
		48	14.3724	±	0.254739	9.94316	±	0.769272	16.6733	±	0.162814
		60	13.7358	±	0.835565	8.92851	±	0.542065	19.7866	±	3.27249
		72	14.9164	±	0.686259	8.92951	±	0.513258	18.4096	±	0.207117
		P-value
		Linear	0.0007			<0.001			0.0011
		Quadratic	0.0085			0.6222			0.005
		Qubic	0.2824			0.3043			0.1393
		Day	Cellulose (% VS)			Hemicellulose (% VS)			Lignin (% VS)
		0	16.784	±	0.545152	15.3923	±	0.526894	15.1441	±	1.01267
		3	16.4941	±	0.59984	14.5363	±	0.335654	13.8499	±	0.138905
		6	16.5846	±	0.490684	13.8827	±	0.158071	15.323	±	0.542343
		12	16.4632	±	0.145732	13.0559	±	0.0774715	13.7169	±	1.06332
		18	15.8967	±	1.2809	13.1954	±	0.312623	18.1771	±	6.18263
		24	14.9349	±	1.32068	13.0776	±	0.404625	24.6054	±	1.90881
		30	14.568	±	0.223673	13.1936	±	0.443054	21.9319	±	4.24207
		36	15.1272	±	0.68566	11.7536	±	0.862518	16.4441	±	0.338364
		48	14.3724	±	0.254739	9.94316	±	0.769272	16.6733	±	0.162814
		60	13.7358	±	0.835565	8.92851	±	0.542065	19.7866	±	3.27249
		72	14.9164	±	0.686259	8.92951	±	0.513258	18.4096	±	0.207117
		P-value
		Linear	0.0007			<0.001			0.0011
		Quadratic	0.0085			0.6222			0.005
		Qubic	0.2824			0.3043			0.1393

## Sheet: SAS Result
VS
The Mixed Procedure
Model Information
Data Set	WORK.SRL
Dependent Variable	VS
Covariance Structure	Diagonal
Estimation Method	REML
Residual Variance Method	Profile
Fixed Effects SE Method	Model-Based
Degrees of Freedom Method	Residual
Dimensions
Covariance Parameters	1
Columns in X	12
Columns in Z	0
Subjects	1
Max Obs per Subject	33
Number of Observations
Number of Observations Read	33
Number of Observations Used	33
Number of Observations Not Used	0
Covariance Parameter Estimates
Cov Parm	Estimate	Standard	Z Value	Pr > Z
		Error
Residual	0.309	0.09318	3.32	0.0005
Fit Statistics
-2 Res Log Likelihood	48.7
AIC (Smaller is Better)	50.7
AICC (Smaller is Better)	50.9
BIC (Smaller is Better)	51.8
Type 3 Tests of Fixed Effects
Effect	Num DF	Den DF	F Value	Pr > F
TRT	10	22	42.8	<.0001
Contrasts
Label	Num DF	Den DF	F Value	Pr > F
Linear	1	22	400.58	<.0001
Quadratic	1	22	4.91	0.0373
Qubic	1	22	11.83	0.0023
Least Squares Means
Effect	TRT	Estimate	Standard	DF	t Value	Pr > |t|
			Error
TRT	0	83.3173	0.321	22	259.59	<.0001
TRT	3	83.6443	0.321	22	260.61	<.0001
TRT	6	83.545	0.321	22	260.3	<.0001
TRT	12	83.513	0.321	22	260.2	<.0001
TRT	18	82.646	0.321	22	257.5	<.0001
TRT	24	81.977	0.321	22	255.42	<.0001
TRT	30	80.5933	0.321	22	251.11	<.0001
TRT	36	79.886	0.321	22	248.9	<.0001
TRT	48	79.2357	0.321	22	246.88	<.0001
TRT	60	78.7117	0.321	22	245.24	<.0001
TRT	72	78.3073	0.321	22	243.98	<.0001
Differences of Least Squares Means
Effect	TRT	_TRT	Estimate	Standard	DF	t Value	Pr > |t|	Adjustment	Adj P
				Error
TRT	0	3	-0.327	0.4539	22	-0.72	0.4788	Tukey	0.9996
TRT	0	6	-0.2277	0.4539	22	-0.5	0.6209	Tukey	1
TRT	0	12	-0.1957	0.4539	22	-0.43	0.6706	Tukey	1
TRT	0	18	0.6713	0.4539	22	1.48	0.1533	Tukey	0.9119
TRT	0	24	1.3403	0.4539	22	2.95	0.0074	Tukey	0.1692
TRT	0	30	2.724	0.4539	22	6	<.0001	Tukey	0.0002
TRT	0	36	3.4313	0.4539	22	7.56	<.0001	Tukey	<.0001
TRT	0	48	4.0817	0.4539	22	8.99	<.0001	Tukey	<.0001
TRT	0	60	4.6057	0.4539	22	10.15	<.0001	Tukey	<.0001
TRT	0	72	5.01	0.4539	22	11.04	<.0001	Tukey	<.0001
TRT	3	6	0.09933	0.4539	22	0.22	0.8288	Tukey	1
TRT	3	12	0.1313	0.4539	22	0.29	0.775	Tukey	1
TRT	3	18	0.9983	0.4539	22	2.2	0.0386	Tukey	0.5273
TRT	3	24	1.6673	0.4539	22	3.67	0.0013	Tukey	0.0406
TRT	3	30	3.051	0.4539	22	6.72	<.0001	Tukey	<.0001
TRT	3	36	3.7583	0.4539	22	8.28	<.0001	Tukey	<.0001
TRT	3	48	4.4087	0.4539	22	9.71	<.0001	Tukey	<.0001
TRT	3	60	4.9327	0.4539	22	10.87	<.0001	Tukey	<.0001
TRT	3	72	5.337	0.4539	22	11.76	<.0001	Tukey	<.0001
TRT	6	12	0.032	0.4539	22	0.07	0.9444	Tukey	1
TRT	6	18	0.899	0.4539	22	1.98	0.0603	Tukey	0.6627
TRT	6	24	1.568	0.4539	22	3.45	0.0023	Tukey	0.0641
TRT	6	30	2.9517	0.4539	22	6.5	<.0001	Tukey	<.0001
TRT	6	36	3.659	0.4539	22	8.06	<.0001	Tukey	<.0001
TRT	6	48	4.3093	0.4539	22	9.49	<.0001	Tukey	<.0001
TRT	6	60	4.8333	0.4539	22	10.65	<.0001	Tukey	<.0001
TRT	6	72	5.2377	0.4539	22	11.54	<.0001	Tukey	<.0001
TRT	12	18	0.867	0.4539	22	1.91	0.0692	Tukey	0.7053
TRT	12	24	1.536	0.4539	22	3.38	0.0027	Tukey	0.074
TRT	12	30	2.9197	0.4539	22	6.43	<.0001	Tukey	<.0001
TRT	12	36	3.627	0.4539	22	7.99	<.0001	Tukey	<.0001
TRT	12	48	4.2773	0.4539	22	9.42	<.0001	Tukey	<.0001
TRT	12	60	4.8013	0.4539	22	10.58	<.0001	Tukey	<.0001
TRT	12	72	5.2057	0.4539	22	11.47	<.0001	Tukey	<.0001
TRT	18	24	0.669	0.4539	22	1.47	0.1547	Tukey	0.9136
TRT	18	30	2.0527	0.4539	22	4.52	0.0002	Tukey	0.0062
TRT	18	36	2.76	0.4539	22	6.08	<.0001	Tukey	0.0002
TRT	18	48	3.4103	0.4539	22	7.51	<.0001	Tukey	<.0001
TRT	18	60	3.9343	0.4539	22	8.67	<.0001	Tukey	<.0001
TRT	18	72	4.3387	0.4539	22	9.56	<.0001	Tukey	<.0001
TRT	24	30	1.3837	0.4539	22	3.05	0.0059	Tukey	0.1421
TRT	24	36	2.091	0.4539	22	4.61	0.0001	Tukey	0.0051
TRT	24	48	2.7413	0.4539	22	6.04	<.0001	Tukey	0.0002
TRT	24	60	3.2653	0.4539	22	7.19	<.0001	Tukey	<.0001
TRT	24	72	3.6697	0.4539	22	8.08	<.0001	Tukey	<.0001
TRT	30	36	0.7073	0.4539	22	1.56	0.1334	Tukey	0.8832
TRT	30	48	1.3577	0.4539	22	2.99	0.0067	Tukey	0.1579
TRT	30	60	1.8817	0.4539	22	4.15	0.0004	Tukey	0.0145
TRT	30	72	2.286	0.4539	22	5.04	<.0001	Tukey	0.0019
TRT	36	48	0.6503	0.4539	22	1.43	0.166	Tukey	0.9264
TRT	36	60	1.1743	0.4539	22	2.59	0.0168	Tukey	0.3118
TRT	36	72	1.5787	0.4539	22	3.48	0.0021	Tukey	0.0611
TRT	48	60	0.524	0.4539	22	1.15	0.2607	Tukey	0.9814
TRT	48	72	0.9283	0.4539	22	2.05	0.053	Tukey	0.6229
TRT	60	72	0.4043	0.4539	22	0.89	0.3827	Tukey	0.9974
VS
Effect=TRT Method=Tukey(P<0.05) Set=1
Obs	TRT	Estimate	Standard Error	Letter
				Group
1	0	83.3173	0.321	ab
2	3	83.6443	0.321	a
3	6	83.545	0.321	ab
4	12	83.513	0.321	ab
5	18	82.646	0.321	ab
6	24	81.977	0.321	bc
7	30	80.5933	0.321	cd
8	36	79.886	0.321	de
9	48	79.2357	0.321	de
10	60	78.7117	0.321	e
11	72	78.3073	0.321	e
Hemi
The Mixed Procedure
Model Information
Data Set	WORK.SRL
Dependent Variable	Hemi
Covariance Structure	Diagonal
Estimation Method	REML
Residual Variance Method	Profile
Fixed Effects SE Method	Model-Based
Degrees of Freedom Method	Residual
Dimensions
Covariance Parameters	1
Columns in X	12
Columns in Z	0
Subjects	1
Max Obs per Subject	33
Number of Observations
Number of Observations Read	33
Number of Observations Used	33
Number of Observations Not Used	0
Covariance Parameter Estimates
Cov Parm	Estimate	Standard	Z Value	Pr > Z
		Error
Residual	3.8e-05	1.1e-05	3.32	0.0005
Fit Statistics
-2 Res Log Likelihood	-149.6
AIC (Smaller is Better)	-147.6
AICC (Smaller is Better)	-147.4
BIC (Smaller is Better)	-146.6
Type 3 Tests of Fixed Effects
Effect	Num DF	Den DF	F Value	Pr > F
TRT	10	22	44.93	<.0001
Contrasts
Label	Num DF	Den DF	F Value	Pr > F
Linear	1	22	407.68	<.0001
Quadratic	1	22	0.25	0.6222
Qubic	1	22	1.11	0.3043
Least Squares Means
Effect	TRT	Estimate	Standard	DF	t Value	Pr > |t|
			Error
TRT	0	0.1847	0.003539	22	52.18	<.0001
TRT	3	0.1737	0.003539	22	49.07	<.0001
TRT	6	0.1663	0.003539	22	47	<.0001
TRT	12	0.1567	0.003539	22	44.27	<.0001
TRT	18	0.1597	0.003539	22	45.12	<.0001
TRT	24	0.1593	0.003539	22	45.02	<.0001
TRT	30	0.1633	0.003539	22	46.15	<.0001
TRT	36	0.1473	0.003539	22	41.63	<.0001
TRT	48	0.1257	0.003539	22	35.51	<.0001
TRT	60	0.1137	0.003539	22	32.12	<.0001
TRT	72	0.114	0.003539	22	32.21	<.0001
Differences of Least Squares Means
Effect	TRT	_TRT	Estimate	Standard	DF	t Value	Pr > |t|	Adjustment	Adj P
				Error
TRT	0	3	0.011	0.005005	22	2.2	0.0388	Tukey	0.5284
TRT	0	6	0.01833	0.005005	22	3.66	0.0014	Tukey	0.0415
TRT	0	12	0.028	0.005005	22	5.59	<.0001	Tukey	0.0005
TRT	0	18	0.025	0.005005	22	4.99	<.0001	Tukey	0.0021
TRT	0	24	0.02533	0.005005	22	5.06	<.0001	Tukey	0.0018
TRT	0	30	0.02133	0.005005	22	4.26	0.0003	Tukey	0.0111
TRT	0	36	0.03733	0.005005	22	7.46	<.0001	Tukey	<.0001
TRT	0	48	0.059	0.005005	22	11.79	<.0001	Tukey	<.0001
TRT	0	60	0.071	0.005005	22	14.19	<.0001	Tukey	<.0001
TRT	0	72	0.07067	0.005005	22	14.12	<.0001	Tukey	<.0001
TRT	3	6	0.007333	0.005005	22	1.47	0.157	Tukey	0.9164
TRT	3	12	0.017	0.005005	22	3.4	0.0026	Tukey	0.0722
TRT	3	18	0.014	0.005005	22	2.8	0.0105	Tukey	0.2221
TRT	3	24	0.01433	0.005005	22	2.86	0.009	Tukey	0.1981
TRT	3	30	0.01033	0.005005	22	2.06	0.0509	Tukey	0.6109
TRT	3	36	0.02633	0.005005	22	5.26	<.0001	Tukey	0.0011
TRT	3	48	0.048	0.005005	22	9.59	<.0001	Tukey	<.0001
TRT	3	60	0.06	0.005005	22	11.99	<.0001	Tukey	<.0001
TRT	3	72	0.05967	0.005005	22	11.92	<.0001	Tukey	<.0001
TRT	6	12	0.009667	0.005005	22	1.93	0.0664	Tukey	0.6926
TRT	6	18	0.006667	0.005005	22	1.33	0.1965	Tukey	0.9524
TRT	6	24	0.007	0.005005	22	1.4	0.1759	Tukey	0.9361
TRT	6	30	0.003	0.005005	22	0.6	0.555	Tukey	0.9999
TRT	6	36	0.019	0.005005	22	3.8	0.001	Tukey	0.0312
TRT	6	48	0.04067	0.005005	22	8.13	<.0001	Tukey	<.0001
TRT	6	60	0.05267	0.005005	22	10.52	<.0001	Tukey	<.0001
TRT	6	72	0.05233	0.005005	22	10.46	<.0001	Tukey	<.0001
TRT	12	18	-0.003	0.005005	22	-0.6	0.555	Tukey	0.9999
TRT	12	24	-0.00267	0.005005	22	-0.53	0.5995	Tukey	1
TRT	12	30	-0.00667	0.005005	22	-1.33	0.1965	Tukey	0.9524
TRT	12	36	0.009333	0.005005	22	1.86	0.0756	Tukey	0.7318
TRT	12	48	0.031	0.005005	22	6.19	<.0001	Tukey	0.0001
TRT	12	60	0.043	0.005005	22	8.59	<.0001	Tukey	<.0001
TRT	12	72	0.04267	0.005005	22	8.52	<.0001	Tukey	<.0001
TRT	18	24	0.000333	0.005005	22	0.07	0.9475	Tukey	1
TRT	18	30	-0.00367	0.005005	22	-0.73	0.4715	Tukey	0.9995
TRT	18	36	0.01233	0.005005	22	2.46	0.022	Tukey	0.3741
TRT	18	48	0.034	0.005005	22	6.79	<.0001	Tukey	<.0001
TRT	18	60	0.046	0.005005	22	9.19	<.0001	Tukey	<.0001
TRT	18	72	0.04567	0.005005	22	9.12	<.0001	Tukey	<.0001
TRT	24	30	-0.004	0.005005	22	-0.8	0.4327	Tukey	0.9989
TRT	24	36	0.012	0.005005	22	2.4	0.0254	Tukey	0.4104
TRT	24	48	0.03367	0.005005	22	6.73	<.0001	Tukey	<.0001
TRT	24	60	0.04567	0.005005	22	9.12	<.0001	Tukey	<.0001
TRT	24	72	0.04533	0.005005	22	9.06	<.0001	Tukey	<.0001
TRT	30	36	0.016	0.005005	22	3.2	0.0042	Tukey	0.1073
TRT	30	48	0.03767	0.005005	22	7.53	<.0001	Tukey	<.0001
TRT	30	60	0.04967	0.005005	22	9.92	<.0001	Tukey	<.0001
TRT	30	72	0.04933	0.005005	22	9.86	<.0001	Tukey	<.0001
TRT	36	48	0.02167	0.005005	22	4.33	0.0003	Tukey	0.0096
TRT	36	60	0.03367	0.005005	22	6.73	<.0001	Tukey	<.0001
TRT	36	72	0.03333	0.005005	22	6.66	<.0001	Tukey	<.0001
TRT	48	60	0.012	0.005005	22	2.4	0.0254	Tukey	0.4104
TRT	48	72	0.01167	0.005005	22	2.33	0.0293	Tukey	0.4485
TRT	60	72	-0.00033	0.005005	22	-0.07	0.9475	Tukey	1
Hemi
Effect=TRT Method=Tukey(P<0.05) Set=1
Obs	TRT	Estimate	Standard Error	Letter
				Group
1	0	0.1847	0.003539	a
2	3	0.1737	0.003539	ab
3	6	0.1663	0.003539	b
4	12	0.1567	0.003539	bc
5	18	0.1597	0.003539	bc
6	24	0.1593	0.003539	bc
7	30	0.1633	0.003539	bc
8	36	0.1473	0.003539	c
9	48	0.1257	0.003539	d
10	60	0.1137	0.003539	d
11	72	0.114	0.003539	d
Cell
The Mixed Procedure
Model Information
Data Set	WORK.SRL
Dependent Variable	Cell
Covariance Structure	Diagonal
Estimation Method	REML
Residual Variance Method	Profile
Fixed Effects SE Method	Model-Based
Degrees of Freedom Method	Residual
Dimensions
Covariance Parameters	1
Columns in X	12
Columns in Z	0
Subjects	1
Max Obs per Subject	33
Number of Observations
Number of Observations Read	33
Number of Observations Used	33
Number of Observations Not Used	0
Covariance Parameter Estimates
Cov Parm	Estimate	Standard	Z Value	Pr > Z
		Error
Residual	7.4e-05	2.2e-05	3.32	0.0005
Fit Statistics
-2 Res Log Likelihood	-134.9
AIC (Smaller is Better)	-132.9
AICC (Smaller is Better)	-132.7
BIC (Smaller is Better)	-131.8
Type 3 Tests of Fixed Effects
Effect	Num DF	Den DF	F Value	Pr > F
TRT	10	22	3.16	0.0117
Contrasts
Label	Num DF	Den DF	F Value	Pr > F
Linear	1	22	15.44	0.0007
Quadratic	1	22	8.36	0.0085
Qubic	1	22	1.21	0.2824
Least Squares Means
Effect	TRT	Estimate	Standard	DF	t Value	Pr > |t|
			Error
TRT	0	0.2013	0.004953	22	40.65	<.0001
TRT	3	0.197	0.004953	22	39.77	<.0001
TRT	6	0.1987	0.004953	22	40.11	<.0001
TRT	12	0.197	0.004953	22	39.77	<.0001
TRT	18	0.192	0.004953	22	38.76	<.0001
TRT	24	0.1823	0.004953	22	36.81	<.0001
TRT	30	0.1803	0.004953	22	36.41	<.0001
TRT	36	0.1893	0.004953	22	38.22	<.0001
TRT	48	0.1813	0.004953	22	36.61	<.0001
TRT	60	0.1743	0.004953	22	35.2	<.0001
TRT	72	0.1903	0.004953	22	38.43	<.0001
Differences of Least Squares Means
Effect	TRT	_TRT	Estimate	Standard	DF	t Value	Pr > |t|	Adjustment	Adj P
				Error
TRT	0	3	0.004333	0.007005	22	0.62	0.5425	Tukey	0.9999
TRT	0	6	0.002667	0.007005	22	0.38	0.7071	Tukey	1
TRT	0	12	0.004333	0.007005	22	0.62	0.5425	Tukey	0.9999
TRT	0	18	0.009333	0.007005	22	1.33	0.1964	Tukey	0.9523
TRT	0	24	0.019	0.007005	22	2.71	0.0127	Tukey	0.2558
TRT	0	30	0.021	0.007005	22	3	0.0066	Tukey	0.156
TRT	0	36	0.012	0.007005	22	1.71	0.1008	Tukey	0.814
TRT	0	48	0.02	0.007005	22	2.86	0.0092	Tukey	0.2012
TRT	0	60	0.027	0.007005	22	3.85	0.0009	Tukey	0.0275
TRT	0	72	0.011	0.007005	22	1.57	0.1306	Tukey	0.8785
TRT	3	6	-0.00167	0.007005	22	-0.24	0.8141	Tukey	1
TRT	3	12	3.47e-18	0.007005	22	0	1	Tukey	1
TRT	3	18	0.005	0.007005	22	0.71	0.4829	Tukey	0.9996
TRT	3	24	0.01467	0.007005	22	2.09	0.048	Tukey	0.5928
TRT	3	30	0.01667	0.007005	22	2.38	0.0264	Tukey	0.4208
TRT	3	36	0.007667	0.007005	22	1.09	0.2856	Tukey	0.9873
TRT	3	48	0.01567	0.007005	22	2.24	0.0358	Tukey	0.5047
TRT	3	60	0.02267	0.007005	22	3.24	0.0038	Tukey	0.0994
TRT	3	72	0.006667	0.007005	22	0.95	0.3516	Tukey	0.9955
TRT	6	12	0.001667	0.007005	22	0.24	0.8141	Tukey	1
TRT	6	18	0.006667	0.007005	22	0.95	0.3516	Tukey	0.9955
TRT	6	24	0.01633	0.007005	22	2.33	0.0293	Tukey	0.4481
TRT	6	30	0.01833	0.007005	22	2.62	0.0157	Tukey	0.2977
TRT	6	36	0.009333	0.007005	22	1.33	0.1964	Tukey	0.9523
TRT	6	48	0.01733	0.007005	22	2.47	0.0215	Tukey	0.3686
TRT	6	60	0.02433	0.007005	22	3.47	0.0022	Tukey	0.0617
TRT	6	72	0.008333	0.007005	22	1.19	0.2469	Tukey	0.9772
TRT	12	18	0.005	0.007005	22	0.71	0.4829	Tukey	0.9996
TRT	12	24	0.01467	0.007005	22	2.09	0.048	Tukey	0.5928
TRT	12	30	0.01667	0.007005	22	2.38	0.0264	Tukey	0.4208
TRT	12	36	0.007667	0.007005	22	1.09	0.2856	Tukey	0.9873
TRT	12	48	0.01567	0.007005	22	2.24	0.0358	Tukey	0.5047
TRT	12	60	0.02267	0.007005	22	3.24	0.0038	Tukey	0.0994
TRT	12	72	0.006667	0.007005	22	0.95	0.3516	Tukey	0.9955
TRT	18	24	0.009667	0.007005	22	1.38	0.1815	Tukey	0.941
TRT	18	30	0.01167	0.007005	22	1.67	0.11	Tukey	0.837
TRT	18	36	0.002667	0.007005	22	0.38	0.7071	Tukey	1
TRT	18	48	0.01067	0.007005	22	1.52	0.1421	Tukey	0.8967
TRT	18	60	0.01767	0.007005	22	2.52	0.0194	Tukey	0.344
TRT	18	72	0.001667	0.007005	22	0.24	0.8141	Tukey	1
TRT	24	30	0.002	0.007005	22	0.29	0.7779	Tukey	1
TRT	24	36	-0.007	0.007005	22	-1	0.3285	Tukey	0.9935
TRT	24	48	0.001	0.007005	22	0.14	0.8878	Tukey	1
TRT	24	60	0.008	0.007005	22	1.14	0.2657	Tukey	0.9828
TRT	24	72	-0.008	0.007005	22	-1.14	0.2657	Tukey	0.9828
TRT	30	36	-0.009	0.007005	22	-1.28	0.2122	Tukey	0.9621
TRT	30	48	-0.001	0.007005	22	-0.14	0.8878	Tukey	1
TRT	30	60	0.006	0.007005	22	0.86	0.4009	Tukey	0.9981
TRT	30	72	-0.01	0.007005	22	-1.43	0.1675	Tukey	0.928
TRT	36	48	0.008	0.007005	22	1.14	0.2657	Tukey	0.9828
TRT	36	60	0.015	0.007005	22	2.14	0.0436	Tukey	0.5632
TRT	36	72	-0.001	0.007005	22	-0.14	0.8878	Tukey	1
TRT	48	60	0.007	0.007005	22	1	0.3285	Tukey	0.9935
TRT	48	72	-0.009	0.007005	22	-1.28	0.2122	Tukey	0.9621
TRT	60	72	-0.016	0.007005	22	-2.28	0.0324	Tukey	0.4761
Cell
Effect=TRT Method=Tukey(P<0.05) Set=1
Obs	TRT	Estimate	Standard Error	Letter
				Group
1	0	0.2013	0.004953	a
2	3	0.197	0.004953	ab
3	6	0.1987	0.004953	ab
4	12	0.197	0.004953	ab
5	18	0.192	0.004953	ab
6	24	0.1823	0.004953	ab
7	30	0.1803	0.004953	ab
8	36	0.1893	0.004953	ab
9	48	0.1813	0.004953	ab
10	60	0.1743	0.004953	b
11	72	0.1903	0.004953	ab
Lignin
The Mixed Procedure
Model Information
Data Set	WORK.SRL
Dependent Variable	Lignin
Covariance Structure	Diagonal
Estimation Method	REML
Residual Variance Method	Profile
Fixed Effects SE Method	Model-Based
Degrees of Freedom Method	Residual
Dimensions
Covariance Parameters	1
Columns in X	12
Columns in Z	0
Subjects	1
Max Obs per Subject	33
Number of Observations
Number of Observations Read	33
Number of Observations Used	33
Number of Observations Not Used	0
Covariance Parameter Estimates
Cov Parm	Estimate	Standard	Z Value	Pr > Z
		Error
Residual	0.001044	0.000315	3.32	0.0005
Fit Statistics
-2 Res Log Likelihood	-76.5
AIC (Smaller is Better)	-74.5
AICC (Smaller is Better)	-74.3
BIC (Smaller is Better)	-73.4
Type 3 Tests of Fixed Effects
Effect	Num DF	Den DF	F Value	Pr > F
TRT	10	22	5.61	0.0004
Contrasts
Label	Num DF	Den DF	F Value	Pr > F
Linear	1	22	14.13	0.0011
Quadratic	1	22	9.73	0.005
Qubic	1	22	2.35	0.1393
Least Squares Means
Effect	TRT	Estimate	Standard	DF	t Value	Pr > |t|
			Error
TRT	0	0.1817	0.01866	22	9.74	<.0001
TRT	3	0.1653	0.01866	22	8.86	<.0001
TRT	6	0.1837	0.01866	22	9.84	<.0001
TRT	12	0.164	0.01866	22	8.79	<.0001
TRT	18	0.2203	0.01866	22	11.81	<.0001
TRT	24	0.3003	0.01866	22	16.1	<.0001
TRT	30	0.2723	0.01866	22	14.6	<.0001
TRT	36	0.206	0.01866	22	11.04	<.0001
TRT	48	0.2107	0.01866	22	11.29	<.0001
TRT	60	0.2517	0.01866	22	13.49	<.0001
TRT	72	0.235	0.01866	22	12.6	<.0001
Differences of Least Squares Means
Effect	TRT	_TRT	Estimate	Standard	DF	t Value	Pr > |t|	Adjustment	Adj P
				Error
TRT	0	3	0.01633	0.02639	22	0.62	0.5423	Tukey	0.9999
TRT	0	6	-0.002	0.02639	22	-0.08	0.9403	Tukey	1
TRT	0	12	0.01767	0.02639	22	0.67	0.5101	Tukey	0.9998
TRT	0	18	-0.03867	0.02639	22	-1.47	0.157	Tukey	0.9164
TRT	0	24	-0.1187	0.02639	22	-4.5	0.0002	Tukey	0.0065
TRT	0	30	-0.09067	0.02639	22	-3.44	0.0024	Tukey	0.0666
TRT	0	36	-0.02433	0.02639	22	-0.92	0.3664	Tukey	0.9965
TRT	0	48	-0.029	0.02639	22	-1.1	0.2836	Tukey	0.9869
TRT	0	60	-0.07	0.02639	22	-2.65	0.0145	Tukey	0.2815
TRT	0	72	-0.05333	0.02639	22	-2.02	0.0556	Tukey	0.6378
TRT	3	6	-0.01833	0.02639	22	-0.69	0.4944	Tukey	0.9997
TRT	3	12	0.001333	0.02639	22	0.05	0.9602	Tukey	1
TRT	3	18	-0.055	0.02639	22	-2.08	0.0489	Tukey	0.5986
TRT	3	24	-0.135	0.02639	22	-5.12	<.0001	Tukey	0.0016
TRT	3	30	-0.107	0.02639	22	-4.06	0.0005	Tukey	0.0177
TRT	3	36	-0.04067	0.02639	22	-1.54	0.1375	Tukey	0.8898
TRT	3	48	-0.04533	0.02639	22	-1.72	0.0998	Tukey	0.8114
TRT	3	60	-0.08633	0.02639	22	-3.27	0.0035	Tukey	0.0926
TRT	3	72	-0.06967	0.02639	22	-2.64	0.0149	Tukey	0.2872
TRT	6	12	0.01967	0.02639	22	0.75	0.464	Tukey	0.9994
TRT	6	18	-0.03667	0.02639	22	-1.39	0.1785	Tukey	0.9385
TRT	6	24	-0.1167	0.02639	22	-4.42	0.0002	Tukey	0.0078
TRT	6	30	-0.08867	0.02639	22	-3.36	0.0028	Tukey	0.0777
TRT	6	36	-0.02233	0.02639	22	-0.85	0.4064	Tukey	0.9983
TRT	6	48	-0.027	0.02639	22	-1.02	0.3173	Tukey	0.9922
TRT	6	60	-0.068	0.02639	22	-2.58	0.0172	Tukey	0.3167
TRT	6	72	-0.05133	0.02639	22	-1.95	0.0646	Tukey	0.6841
TRT	12	18	-0.05633	0.02639	22	-2.13	0.0441	Tukey	0.5672
TRT	12	24	-0.1363	0.02639	22	-5.17	<.0001	Tukey	0.0014
TRT	12	30	-0.1083	0.02639	22	-4.11	0.0005	Tukey	0.0158
TRT	12	36	-0.042	0.02639	22	-1.59	0.1257	Tukey	0.8697
TRT	12	48	-0.04667	0.02639	22	-1.77	0.0908	Tukey	0.7853
TRT	12	60	-0.08767	0.02639	22	-3.32	0.0031	Tukey	0.0838
TRT	12	72	-0.071	0.02639	22	-2.69	0.0134	Tukey	0.2649
TRT	18	24	-0.08	0.02639	22	-3.03	0.0061	Tukey	0.1465
TRT	18	30	-0.052	0.02639	22	-1.97	0.0615	Tukey	0.6688
TRT	18	36	0.01433	0.02639	22	0.54	0.5924	Tukey	1
TRT	18	48	0.009667	0.02639	22	0.37	0.7176	Tukey	1
TRT	18	60	-0.03133	0.02639	22	-1.19	0.2477	Tukey	0.9775
TRT	18	72	-0.01467	0.02639	22	-0.56	0.5839	Tukey	1
TRT	24	30	0.028	0.02639	22	1.06	0.3001	Tukey	0.9898
TRT	24	36	0.09433	0.02639	22	3.58	0.0017	Tukey	0.05
TRT	24	48	0.08967	0.02639	22	3.4	0.0026	Tukey	0.0719
TRT	24	60	0.04867	0.02639	22	1.84	0.0786	Tukey	0.7435
TRT	24	72	0.06533	0.02639	22	2.48	0.0215	Tukey	0.3678
TRT	30	36	0.06633	0.02639	22	2.51	0.0198	Tukey	0.3481
TRT	30	48	0.06167	0.02639	22	2.34	0.0289	Tukey	0.4449
TRT	30	60	0.02067	0.02639	22	0.78	0.4418	Tukey	0.9991
TRT	30	72	0.03733	0.02639	22	1.41	0.1711	Tukey	0.9316
TRT	36	48	-0.00467	0.02639	22	-0.18	0.8612	Tukey	1
TRT	36	60	-0.04567	0.02639	22	-1.73	0.0975	Tukey	0.805
TRT	36	72	-0.029	0.02639	22	-1.1	0.2836	Tukey	0.9869
TRT	48	60	-0.041	0.02639	22	-1.55	0.1345	Tukey	0.885
TRT	48	72	-0.02433	0.02639	22	-0.92	0.3664	Tukey	0.9965
TRT	60	72	0.01667	0.02639	22	0.63	0.5341	Tukey	0.9999
Lignin
Effect=TRT Method=Tukey(P<0.05) Set=1
Obs	TRT	Estimate	Standard Error	Letter Group
1	0	0.1817	0.01866	bc
2	3	0.1653	0.01866	c
3	6	0.1837	0.01866	bc
4	12	0.164	0.01866	c
5	18	0.2203	0.01866	abc
6	24	0.3003	0.01866	a
7	30	0.2723	0.01866	ab
8	36	0.206	0.01866	bc
9	48	0.2107	0.01866	abc
10	60	0.2517	0.01866	abc
11	72	0.235	0.01866	abc
