# Supplementary material for: Fermentation characteristics of bedded pack barn dairy cattle manure on methane yield, carbon, and nitrogen content in solid-state anaerobic digestion
Source: PeerJ. 2022 Oct 14;10:e14134. doi: 10.7717/peerj.14134 (PMC9575680; doi:10.7717/peerj.14134)
Supplement: Supplemental Information 4 [file peerj-10-14134-s004.xlsx]

## Sheet: pH
Time	REP	pH
0	1	7.75			Big D	Blk
0	2	7.78		0	7.78333	6.535
0	3	7.82		3	7.56333	7.54
0	BLK	6.54		6	7.65	7.67
3	1	7.55		12	7.46333	8.01
3	2	7.6		18	8.49	8.32
3	3	7.54		24	8.16333	7.94
3	BLK	7.54		30	8.22	7.82
6	1	7.68		36	8.26	8.11
6	2	7.59		48	8.21	8.12
6	3	7.68		60	8.11	8.04
6	BLK	7.67		72	8.26667	8.27
12	1	7.53
12	2	7.44
12	3	7.42
12	BLK	8.01
18	1	8.55
18	2	8.44
18	3	8.48
18	BLK	8.32
24	1	8.2
24	2	8.17
24	3	8.12
24	BLK	7.94
30	1	8.2
30	2	8.26
30	3	8.2
30	BLK	7.82
36	1	8.28
36	2	8.26
36	3	8.24
36	BLK	8.11
48	1	8.25
48	2	8.23
48	3	8.15
48	BLK	8.12
60	1	8.16
60	2	8.09
60	3	8.08
60	BLK	8.04
72	1	8.3
72	2	8.26
72	3	8.24
72	BLK	8.27

## Sheet: NH4-N&Ammonium
NH4-N	TIME/REP	1	2	3	AVG.
	0	698.384	698.884	697.884	698.384
	3	1099.35	1027.16	966.666	1031.06
	6	1069.78	1089.97	1139.93	1099.89
	12	1161.83	1095.55	1059.27	1105.55
	18	1191.79	989.988	1074.72	1085.5
	24	1137.48	1114.01	1058.24	1103.24
	30	909.349	904.419	986.081	933.283
	36	931.723	817.466	971.969	907.052
	48	861.414	752.933	773.464	795.937
	60	1002.15	945.249	818.462	921.954
	72	1021.48	900.499	972.92	964.967
AMMONIUM	TIME/REP	1	2	3	AVG.
	0	23.1138	23.4438	22.7838	23.1138
	3	22.2159	20.757	19.5346	20.8358
	6	32.3796	32.9907	34.503	33.2911
	12	26.0245	24.5398	23.7272	24.7638
	18	162.201	134.736	146.268	147.735
	24	117.258	114.838	109.09	113.729
	30	100.223	99.6797	108.68	102.861
	36	118.836	104.263	123.969	115.69
	48	83.7367	73.1914	75.1872	77.3718
	60	62.9495	59.3753	51.4112	57.912
	72	89.9413	79.2888	85.6655	84.9652

## Sheet: vfa
Time, days	Volatile fatty acid, mg/L				Time, days	Acetic acid, mg/L				Time, days	Propionic acid, mg/L
0	227.32	.	.		0	134.461	.	.		0	61.1751	.	.
6	429.626	247.052	241.086		6	259.091	147.283	145.154		6	113.08	65.364	63.0041
12	297.164	449.591	342.464		12	182.796	277.875	209.479		12	75.728	113.232	85.0102
18	334.587	377.326	359.842		18	212.107	233.79	223.191		18	80.45	95.2172	93.7501
24	189.241	220.894	241.7		24	41.1594	64.5872	63.2215		24	100.678	107.089	123.644
30	112.106	144.533	155.946		30	17.4514	38.0965	28.6913		30	89.1986	100.036	117.948
36	14.9068	16.7576	3.63233		36	13.779	16.7576	3.27831		36	1.12779	0	0
42	0	2.43628	17.2581		42	0	2.43628	16.6274		42	0	0	0
48	1.97816	0	0		48	0	0	0		48	1.51128	0	0
60	0.42814	0	0		60	0	0	0		60	0	0	0
72	0	0	1.03603		72	0	0	0		72	0	0	0
