# Supplementary material for: Fermentation characteristics of bedded pack barn dairy cattle manure on methane yield, carbon, and nitrogen content in solid-state anaerobic digestion
Source: PeerJ. 2022 Oct 14;10:e14134. doi: 10.7717/peerj.14134 (PMC9575680; doi:10.7717/peerj.14134)
Supplement: Supplemental Information 5 [file peerj-10-14134-s005.xlsx]

## Sheet: Carbon content
BDCM				BDCM	after NDF	after ADF		BDCM	after NDF	after ADF		BDCM - after NDF	after NDF - after ADF	after ADF							AVERAGE	AVERAGE	AVERAGE
VS, g				Carbon, g	Carbon, g	Carbon, g		Carbon, %v.b	Carbon, %v.b	Carbon, %v.b		Carbon, %v.b	Carbon, %v.b	Carbon, %v.b							BDCM - after NDF	after NDF - after ADF	after ADF
37.705		0	1	18.098	12.094	5.12829		47.999	32.0754	13.6011		15.9236	18.4743	13.6011		15.4278	18.834	13.5323		Digestion time, d	Carbon, %v.b	Carbon, %v.b	Carbon, %v.b
37.8781		0	2	17.7676	12.0122	5.12818		46.9073	31.7129	13.5386		15.1945	18.1742	13.5386						0	15.4278	18.834	13.5323
38.1094		0	3	18.4739	12.6945	5.12848		48.4759	33.3106	13.4572		15.1654	19.8533	13.4572						3	14.0026	14.3646	8.9379
38.0883		3	1	14.8144	9.2331	3.91239		38.895	24.2413	10.2719		14.6536	13.9694	10.2719		14.0026	14.3646	8.9379		6	14.6107	12.2047	8.81589
37.8725		3	2	14.5405	9.16049	3.46053		38.3932	24.1877	9.13731		14.2055	15.0504	9.13731						12	15.0947	13.7636	9.87211
38.178		3	3	13.2199	8.20002	2.82689		34.627	21.4784	7.40449		13.1486	14.0739	7.40449						18	15.1413	14.0638	9.66562
38.0361		6	1	13.1973	7.96517	3.44303		34.6967	20.9411	9.052		13.7556	11.8891	9.052		14.6107	12.2047	8.81589		24	12.4686	11.7214	10.1373
38.1374		6	2	13.4779	7.77235	3.33031		35.3403	20.3799	8.73242		14.9605	11.6475	8.73242						30	11.9309	11.264	10.7633
37.8296		6	3	13.9428	8.22446	3.27727		36.857	21.7408	8.66325		15.1162	13.0776	8.66325						36	12.534	10.6077	9.05196
37.6931		12	1	.	9.17055	3.94535		.	24.3295	10.4671		.	13.8625	10.4671		15.0947	13.7636	9.87211		48	13.1489	10.3114	8.20744
38.136		12	2	14.6356	8.71868	3.6736		38.3775	22.8621	9.63287		15.5154	13.2292	9.63287						60	12.5662	10.0391	7.19475
38.13		12	3	14.638	9.0428	3.62861		38.3898	23.7157	9.51641		14.6741	14.1993	9.51641						72	12.8767	9.79952	7.27781
38.1177		18	1	14.6287	9.24553	3.93184		38.3776	24.2552	10.315		14.1224	13.9402	10.315		15.1413	14.0638	9.66562
37.4492		18	2	.	9.57961	3.85041		.	25.5803	10.2817		.	15.2986	10.2817
37.2095		18	3	13.9583	7.94521	3.12567		37.5128	21.3526	8.40018		16.1602	12.9524	8.40018
37.3517		24	1	13.1645	8.24737	3.90668		35.2447	22.0803	10.4592		13.1644	11.6211	10.4592		12.4686	11.7214	10.1373
37.4554		24	2	12.2364	8.23102	3.94567		32.6692	21.9755	10.5343		10.6937	11.4412	10.5343
37.0567		24	3	12.995	7.97474	3.49015		35.0679	21.5204	9.41841		13.5476	12.102	9.41841
36.7072		30	1	11.7757	7.46933	3.72838		32.08	20.3484	10.1571		11.7316	10.1913	10.1571		11.9309	11.264	10.7633
36.5197		30	2	13.4663	9.35091	4.41688		36.874	25.6051	12.0945		11.2689	13.5106	12.0945
36.7486		30	3	12.098	7.397	3.689		32.9209	20.1287	10.0385		12.7922	10.0902	10.0385
36.2803		36	1	10.8393	6.67458	3.26865		29.8766	18.3972	9.00944		11.4794	9.38779	9.00944		12.534	10.6077	9.05196
36.4062		36	2	12.453	7.65534	3.41415		34.2058	21.0276	9.37793		13.1783	11.6496	9.37793
36.3234		36	3	11.8045	7.10269	3.18502		32.4982	19.554	8.76851		12.9442	10.7855	8.76851
35.9024		48	1	11.46	6.50943	3.07118		31.9198	18.1309	8.55426		13.7889	9.57667	8.55426		13.1489	10.3114	8.20744
35.8452		48	2	11.6597	6.90473	3.01074		32.5279	19.2626	8.39927		13.2653	10.8633	8.39927
36.3754		48	3	11.1147	6.60684	2.78955		30.5555	18.1629	7.66879		12.3926	10.4941	7.66879
35.6965		60	1	10.2731	6.04893	2.39343		28.7791	16.9454	6.70496		11.8336	10.2405	6.70496		12.5662	10.0391	7.19475
35.7345		60	2	10.724	5.91356	2.5805		30.0103	16.5486	7.22131		13.4617	9.32728	7.22131
35.9771		60	3	11.0129	6.55054	2.75513		30.6108	18.2075	7.65799		12.4033	10.5495	7.65799
35.1887		72	1	10.3233	5.91869	2.59967		29.3369	16.8199	7.38781		12.5171	9.43205	7.38781		12.8767	9.79952	7.27781
35.6972		72	2	10.9304	6.22702	2.64223		30.6198	17.444	7.4018		13.1758	10.0422	7.4018
35.9701		72	3	10.757	6.10345	2.53367		29.9053	16.9681	7.04383		12.9372	9.92429	7.04383
			0	15.4278	18.834	13.5323
			3	14.0026	14.3646	8.9379
			6	14.6107	12.2047	8.81589
			12	15.0947	13.7636	9.87211
			18	15.1413	14.0638	9.66562
			24	12.4686	11.7214	10.1373
			30	11.9309	11.264	10.7633
			36	12.534	10.6077	9.05196
			48	13.1489	10.3114	8.20744
			60	12.5662	10.0391	7.19475
			72	12.8767	9.79952	7.27781
				Quadratic								Quadratic							Quadratic
				dm'output;clear;log;clear';								dm'output;clear;log;clear';							dm'output;clear;log;clear';
				Data BGK1302;								Data BGK1302;							Data BGK1302;
				input x y;								input x y;							input x y;
				datalines;								datalines;							datalines;
				0	15.4278							0	18.834						0	13.5323
				3	14.0026							3	14.3646						3	8.9379
				6	14.6107							6	12.2047						6	8.81589
				12	15.0947							12	13.7636						12	9.87211
				18	15.1413							18	14.0638						18	9.66562
				24	12.4686							24	11.7214						24	10.1373
				30	11.9309							30	11.264						30	10.7633
				36	12.534							36	10.6077						36	9.05196
				48	13.1489							48	10.3114						48	8.20744
				60	12.5662							60	10.0391						60	7.19475
				72	12.8767							72	9.79952						72	7.27781
				;								;							;
				data fill;								data fill;							data fill;
				do x=1.17 to 1.63 by 0.001; y=.;output; end;								do x=1.17 to 1.63 by 0.001; y=.;output; end;							do x=1.17 to 1.63 by 0.001; y=.;output; end;
				run;								run;							run;
				data BGK1302; set BGK1302 fill; run;								data BGK1302; set BGK1302 fill; run;							data BGK1302; set BGK1302 fill; run;
				proc sort data=BGK1302; by x;								proc sort data=BGK1302; by x;							proc sort data=BGK1302; by x;
				ods html body='temp.xls';								ods html body='temp.xls';							ods html body='temp.xls';
				proc nlin data=BGK1302;								proc nlin data=BGK1302;							proc nlin data=BGK1302;
				parameters L=0.84 V=-0.333 R=2;								parameters L=0.84 V=-0.333 R=2;							parameters L=0.84 V=-0.333 R=2;
				model y = L + V*(R-x)*(R-x);								model y = L + V*(R-x)*(R-x);							model y = L + V*(R-x)*(R-x);
				output out=ppp p=predy;								output out=ppp p=predy;							output out=ppp p=predy;
				run;								run;							run;
				proc gplot;								proc gplot;							proc gplot;
				title2 'quadratic';								title2 'quadratic';							title2 'quadratic';
				goptions hpos=35 vpos=35 ftext=swiss;								goptions hpos=35 vpos=35 ftext=swiss;							goptions hpos=35 vpos=35 ftext=swiss;
				symbol1 v=dot c=black;								symbol1 v=dot c=black;							symbol1 v=dot c=black;
				symbol2 i=join v=none c=black;								symbol2 i=join v=none c=black;							symbol2 i=join v=none c=black;
				plot y*x predy*x/overlay;								plot y*x predy*x/overlay;							plot y*x predy*x/overlay;
				run;								run;							run;
				ods html close;								ods html close;							ods html close;
				quit;								quit;							quit;
				SAS 시스템								SAS 시스템							SAS 시스템
				quadratic								quadratic							quadratic
				The NLIN Procedure								The NLIN Procedure							The NLIN Procedure
				Dependent Variable y								Dependent Variable y							Dependent Variable y
				Method: Gauss-Newton								Method: Gauss-Newton							Method: Gauss-Newton
				Iterative Phase								Iterative Phase							Iterative Phase
				Iter	L	V	R	Sum of Squares				Iter	L	V	R	Sum of Squares			Iter	L	V	R	Sum of Squares
				0	0.84	-0.333	2	4771382				0	0.84	-0.333	2	4749061			0	0.84	-0.333	2	4727745
				1	15.0592	0.00103	1.8461	145.6				1	15.6979	0.00186	1.6851	604.1			1	10.6762	-0.00014	1.9365	39.7433
				2	15.075	0.00103	51.7885	78.7697				2	15.7642	0.00186	58.4375	411.7			2	10.6776	-0.00014	-73.6984	19.3997
				3	12.5076	0.00103	51.7885	6.2639				3	9.7793	0.00186	58.4375	17.7203			3	11.7707	-0.00014	-108.2	17.9294
																			4	13.3016	-0.00014	-141.9	16.7052
				NOTE: Convergence criterion met.								NOTE: Convergence criterion met.							5	13.8467	-0.00014	-149	16.1821
																			6	13.8766	-0.00014	-149.3	16.1794
				Estimation Summary								Estimation Summary							7	13.8769	-0.00014	-149.3	16.1794
				Method	Gauss-Newton							Method	Gauss-Newton
				Iterations	3							Iterations	3						NOTE: Convergence criterion met.
				R	0							R	0
				PPC	0							PPC	0						Estimation Summary
				RPC(L)	0.170307							RPC(L)	0.379652						Method	Gauss-Newton
				Object	0.920479							Object	0.956961						Iterations	7
				Objective	6.26388							Objective	17.7203						Subiterations	2
				Observations Read	472							Observations Read	472						Average Subiterations	0.285714
				Observations Used	11							Observations Used	11						R	1.794e-07
				Observations Missing	461							Observations Missing	461						PPC(L)	2.886e-08
																			RPC(L)	1.8e-05
				Source	DF	Sum of Squares	Mean Square	F Value	Approx			Source	DF	Sum of Squares	Mean Square	F Value	Approx		Object	1.261e-08
									Pr > F								Pr > F		Objective	16.1794
				Model	2	9.8648	4.9324	6.3	0.0227			Model	2	53.8331	26.9165	12.15	0.0038		Observations Read	472
				Error	8	6.2639	0.783					Error	8	17.7203	2.215				Observations Used	11
				Corrected Total	10	16.1287						Corrected Total	10	71.5533					Observations Missing	461
				Parameter	Estimate	Approx	Approximate 95% Confidence					Parameter	Estimate	Approx	Approximate 95% Confidence				Source	DF	Sum of Squares	Mean Square	F Value	Approx
						Std Error	Limits							Std Error	Limits									Pr > F
				L	12.5076	0.4116	11.5586	13.4567				L	9.7793	0.7484	8.0534	11.5051			Model	2	15.057	7.5285	3.72	0.072
				V	0.00103	0.000571	-0.00029	0.00235				V	0.00186	0.00096	-0.00036	0.00407			Error	8	16.1794	2.0224
				R	51.7885	11.2097	25.9389	77.6382				R	58.4375	13.5149	27.2719	89.603			Corrected Total	10	31.2363
				Approximate Correlation Matrix								Approximate Correlation Matrix							Parameter	Estimate	Approx	Approximate 95% Confidence
					L	V	R						L	V	R						Std Error	Limits
				L	1	-0.351799	-0.040192					L	1	0.0282839	-0.340119				L	13.8769	30.6253	-56.7452	84.4989
				V	-0.351799	1	-0.86124					V	0.0282839	1	-0.919655				V	-0.00014	0.000917	-0.00225	0.00198
				R	-0.040192	-0.86124	1					R	-0.340119	-0.919655	1				R	-149.3	1207.4	-2933.6	2634.9
																			Approximate Correlation Matrix
																				L	V	R
																			L	1	0.993922	-0.998469
																			V	0.993922	1	-0.998439
																			R	-0.998469	-0.998439	1

## Sheet: Nitrogen content
BDCM			BDCM	after NDF	after ADF		BDCM	after NDF	after ADF		BDCM - after NDF	after NDF - after ADF	after ADF			TotalN-NDIN	NDIN - ADIN	ADIN
VS, g		Digestion time, d	Nitrogen, g	Nitrogen, g	Nitrogen, g		Nitrogen, % v.b.	Nitrogen, % v.b.	Nitrogen, % v.b.		Nitrogen, % v.b.	Nitrogen, % v.b.	Nitrogen, % v.b.		Digestion time, d	Nitrogen, % v.b.	Nitrogen, % v.b.	Nitrogen, % v.b.
37.705	1	0	1.13657	0.415453	0.151858		3.01437	1.10185	0.402753		1.91252	0.699096	0.402753		0	1.59229	0.699096	0.402753
37.8781	1	0	1.10224	0.509076	0.121255		2.90998	1.34399	.		1.56599	.	.		3	1.45973	0.330093	0.248034
38.1094	1	0	0.9807	0.485905	0.131112		2.57338	1.27503	.		1.29835	.	.		6	1.3656	0.195833	0.209458
38.0883	2	3	0.701165	0.237873	0.119035		1.84089	0.624532	0.312523		1.21636	0.312009	0.312523		12	1.25716	0.346539	0.234799
37.8725	2	3	0.802153	0.198782	0.0929471		2.11804	0.524871	0.245421		1.59317	0.27945	0.245421		18	1.10709	0.330427	0.269041
38.178	2	3	0.822602	0.223333	0.0710713		2.15465	0.584977	0.186158		1.56967	0.398819	0.186158		24	1.14666	0.314767	0.363187
38.0361	3	6	0.690833	0.200318	0.0853445		1.81625	0.526651	0.224377		1.2896	0.302274	0.224377		30	1.06716	0.395154	0.346205
38.1374	3	6	0.704661	0.154873	0.0687524		1.84769	0.406094	0.180276		1.4416	0.225818	0.180276		36	1.11728	0.308241	0.344741
37.8296	3	6	0.765149	0.107106	0.0846323		2.02262	0.283127	0.22372		.	0.0594078	0.22372		48	1.25794	0.165158	0.290848
37.6931	4	12	0.71462	0.211412	0.133557		1.89589	0.560876	0.354327		1.33502	0.20655	0.354327		60	1.30748	0.156875	0.293712
38.136	4	12	0.655293	0.198817	0.0687456		1.7183	0.521335	0.180264		1.19697	0.341071	0.180264		72	1.36409	0.197375	0.276189
38.13	4	12	0.724971	0.252345	0.0647468		1.90131	0.661802	0.169805		1.23951	0.491997	0.169805
38.1177	5	18	0.469797	0.171705	0.111399		1.23249	0.450461	0.292249		0.78203	0.158212	0.292249
37.4492	5	18	0.666413	0.226408	0.116272		1.77951	0.604573	0.31048		1.17494	0.294093	0.31048
37.2095	5	18	0.635097	0.127452	0.0760541		1.70681	0.342526	0.204394		1.36429	0.138132	0.204394
37.3517	6	24	0.647001	0.24587	0.128884		1.73218	0.658257	0.345054		1.07393	0.313203	0.345054
37.4554	6	24	0.561347	0.152058	0.135525		1.49871	0.40597	0.361831		1.09274	0.0441391	0.361831
37.0567	6	24	0.65563	0.183786	0.141807		1.76926	0.49596	0.382675		1.2733	0.113285	0.382675
36.7072	7	30	0.563159	0.26588	0.106313		1.53419	0.724325	0.289624		0.809868	0.434701	0.289624
36.5197	7	30	0.714808	0.301847	0.148503		1.95732	0.82653	0.406638		1.13079	0.419892	0.406638
36.7486	7	30	0.710728	0.247399	0.12581		1.93403	0.67322	0.342352		1.26081	0.330868	0.342352
36.2803	8	36	0.692351	0.172519	0.129612		1.90834	0.475517	0.357253		1.43282	0.118264	0.357253
36.4062	8	36	0.583799	0.341358	0.142556		1.60357	0.937637	0.391571		0.665935	0.546065	0.391571
36.3234	8	36	0.65341	0.19825	0.103666		1.79887	0.545792	0.285398		1.25308	0.260395	0.285398
35.9024	9	48	0.671178	0.203604	0.104686		1.86945	0.567105	0.291584		1.30235	0.27552	0.291584
35.8452	9	48	0.642099	0.184032	0.102089		1.79131	0.513407	0.284805		1.2779	0.228603	0.284805
36.3754	9	48	0.620224	0.186054	0.107727		1.70506	0.511482	0.296154		1.19358	0.215328	0.296154
35.6965	10	60	0.730998	0.221926	0.0933121		2.04781	0.621702	0.261404		1.42611	0.360298	0.261404
35.7345	10	60	0.645159	0.19123	0.103144		1.80542	0.535141	0.288638		1.27028	0.246503	0.288638
35.9771	10	60	0.681203	0.240104	0.119118		1.89343	0.66738	0.331094		1.22605	0.336286	0.331094
35.1887	11	72	0.627184	0.162442	0.0961535		1.78235	0.46163	0.273251		1.32072	0.188379	0.273251
35.6972	11	72	0.757814	0.203752	0.0956843		2.1229	0.570779	0.268045		1.55212	0.302735	0.268045
35.9701	11	72	0.638947	0.20031	0.103332		1.77633	0.55688	0.287271		1.21945	0.269609	0.287271
						TotalN-NDIN			NDIN - ADIN			ADIN
						Gomperz curve			Gomperz curve			Gomperz curve
				0	1.59229	1.5773		0.699096	0.699097		0.402753	0.272817
				3	1.45973	1.49192		0.330093	0.330244		0.248034	0.272817
				6	1.3656	1.3306		0.195833	0.268063		0.209458	0.272817
				12	1.25716	1.22805		0.346539	0.268048		0.234799	0.272817
				18	1.10709	1.20937		0.330427	0.268048		0.269041	0.272817
				24	1.14666	1.20392		0.314767	0.268048		0.363187	0.319147
				30	1.06716	1.20177		0.395154	0.268048		0.346205	0.319147
				36	1.11728	1.20075		0.308241	0.268048		0.344741	0.319147
				48	1.25794	1.19987		0.165158	0.268048		0.290848	0.319147
				60	1.30748	1.19953		0.156875	0.268048		0.293712	0.319147
				72	1.36409	1.19937		0.197375	0.268048		0.276189	0.319147
				Sysmetrical sigmoidal Equation parameter				Sysmetrical sigmoidal Equation parameter			Sysmetrical sigmoidal Equation parameter
				a		1.5773		a	0.699097		a	0.272817
				b		2.68582		b	12.2863		b	122.57
				c		4.74665		c	2.59536		c	20.4893
				d		1.19912		d	0.268048		d	0.319147
				SUMXMY2		0.0843233		SUMXMY2	0.0631635		SUMXMY2	0.0295915
				Sysmetrical sigmoidal Equation

## Sheet: SAS & Table (C,N)
dm'output;clear;log;clear';
Data SRL;
Input
TRT	REP	TN	NDIN	ADIN	TC	NDIC	ADIC																									Table B.1.4. Change in carbon content of bedded pack barn dairy cattle manure by the digestion time in the batch solids-state anaerobic digestion (n=3)
;Cards;																																Day	TC (% VS)			NDIC (% VS)			ADIC (% VS)
1	1	1.91252	0.699096	0.402753	15.9236	18.4743	13.6011										1.59229	0.699096	0.402753	15.4278	18.834	13.5323		0.307927	0	0	0.429627	0.895454	0.0721207			0	15.4278	±	0.429627	18.834	±	0.895454	13.5323	±	0.0721207
1	1	1.56599	.	.	15.1945	18.1742	13.5386																									3	14.0026	±	0.772759	14.3646	±	0.596247	8.9379	±	1.44407
1	1	1.29835	.	.	15.1654	19.8533	13.4572																									6	14.6107	±	0.74467	12.2047	±	0.765511	8.81589	±	0.207383
2	1	1.21636	0.312009	0.312523	14.6536	13.9694	10.2719										1.45973	0.330093	0.248034	14.0026	14.3646	8.9379		0.211094	0.0617053	0.0632234	0.772759	0.596247	1.44407			12	15.0947	±	0.594924	13.7636	±	0.492544	9.87211	±	0.518511
2	1	1.59317	0.27945	0.245421	14.2055	15.0504	9.13731																									18	15.1413	±	1.44095	14.0638	±	1.17795	9.66562	±	1.09603
2	1	1.56967	0.398819	0.186158	13.1486	14.0739	7.40449																									24	12.4686	±	1.54897	11.7214	±	0.341612	10.1373	±	0.623713
3	1	1.2896	0.302274	0.224377	13.7556	11.8891	9.052										1.3656	0.195833	0.209458	14.6107	12.2047	8.81589		0.107477	0.124178	0.0252744	0.74467	0.765511	0.207383			30	11.9309	±	0.780949	11.264	±	1.94622	10.7633	±	1.15434
3	1	1.4416	0.225818	0.180276	14.9605	11.6475	8.73242																									36	12.534	±	0.92073	10.6077	±	1.14137	9.05196	±	0.306927
3	1	.	0.0594078	0.22372	15.1162	13.0776	8.66325																									48	13.1489	±	0.705408	10.3114	±	0.662519	8.20744	±	0.472879
4	1	1.33502	0.20655	0.354327	.	13.8625	10.4671										1.25716	0.346539	0.234799	15.0947	13.7636	9.87211		0.070696	0.142802	0.103646	0.594924	0.492544	0.518511			60	12.5662	±	0.826152	10.0391	±	0.635517	7.19475	±	0.477072
4	1	1.19697	0.341071	0.180264	15.5154	13.2292	9.63287																									72	12.8767	±	0.333513	9.79952	±	0.323652	7.27781	±	0.202754
4	2	1.23951	0.491997	0.169805	14.6741	14.1993	9.51641																									P-value
5	2	0.78203	0.158212	0.292249	14.1224	13.9402	10.315										1.10709	0.196812	0.269041	15.1413	14.0638	9.66562		0.297	0.0848438	0.0567229	1.44095	1.17795	1.09603			Linear	<0.001			<0.001			<0.001
5	2	1.17494	0.294093	0.31048	.	15.2986	10.2817																									Quadratic	0.005			<0.001			0.614
5	2	1.36429	0.138132	0.204394	16.1602	12.9524	8.40018																									Qubic	0.653			0.0535			0.265
6	2	1.07393	0.313203	0.345054	13.1644	11.6211	10.4592										1.14666	0.156875	0.363187	12.4686	11.7214	10.1373		0.110081	0.139728	0.0188472	1.54897	0.341612	0.623713
6	2	1.09274	0.0441391	0.361831	10.6937	11.4412	10.5343
6	2	1.2733	0.113285	0.382675	13.5476	12.102	9.41841
7	2	0.809868	0.434701	0.289624	11.7316	10.1913	10.1571										1.06716	0.395154	0.346205	11.9309	11.264	10.7633		0.232108	0.0561635	0.0586023	0.780949	1.94622	1.15434
7	2	1.13079	0.419892	0.406638	11.2689	13.5106	12.0945																									Table B.1.5. Change in nitrogen content of bedded pack barn dairy cattle manure by the digestion time in the batch solids-state anaerobic digestion (n=3)
7	2	1.26081	0.330868	0.342352	12.7922	10.0902	10.0385																									Day	TN (% VS)			NDIC (% VS)			ADIC (% VS)
8	2	1.43282	0.118264	0.357253	11.4794	9.38779	9.00944										1.11728	0.308241	0.344741	12.534	10.6077	9.05196		0.401073	0.217877	0.0541815	0.92073	1.14137	0.306927			0	1.59229	±	0.307927	0.402753	±	0	0.134251	±	0
8	3	0.665935	0.546065	0.391571	13.1783	11.6496	9.37793																									3	1.45973	±	0.211094	0.248034	±	0.0617053	0.248034	±	0.0632234
8	3	1.25308	0.260395	0.285398	12.9442	10.7855	8.76851																									6	1.3656	±	0.107477	0.209458	±	0.124178	0.209457	±	0.0252744
9	3	1.30235	0.27552	0.291584	13.7889	9.57667	8.55426										1.25794	0.239817	0.290848	13.1489	10.3114	8.20744		0.057066	0.0316241	0.00571039	0.705408	0.662519	0.472879			12	1.25716	±	0.070696	0.234799	±	0.142802	0.2348	±	0.103646
9	3	1.2779	0.228603	0.284805	13.2653	10.8633	8.39927																									18	1.10709	±	0.297	0.269041	±	0.0848438	0.269041	±	0.0567229
9	3	1.19358	0.215328	0.296154	12.3926	10.4941	7.66879																									24	1.14666	±	0.110081	0.363187	±	0.139728	0.363187	±	0.0188472
10	3	1.42611	0.360298	0.261404	11.8336	10.2405	6.70496										1.30748	0.314362	0.293712	12.5662	10.0391	7.19475		0.10509	0.0599821	0.0351209	0.826152	0.635517	0.477072			30	1.06716	±	0.232108	0.346205	±	0.0561635	0.346205	±	0.0586023
10	3	1.27028	0.246503	0.288638	13.4617	9.32728	7.22131																									36	1.11728	±	0.401073	0.344741	±	0.217877	0.34474	±	0.0541815
10	3	1.22605	0.336286	0.331094	12.4033	10.5495	7.65799																									48	1.25794	±	0.057066	0.290848	±	0.0316241	0.290848	±	0.00571039
11	3	1.32072	0.188379	0.273251	12.5171	9.43205	7.38781										1.36409	0.253574	0.276189	12.8767	9.79952	7.27781		0.170524	0.0588399	0.00994398	0.333513	0.323652	0.202754			60	1.30748	±	0.10509	0.293712	±	0.0599821	0.293713	±	0.0351209
11	3	1.55212	0.302735	0.268045	13.1758	10.0422	7.4018																									72	1.36409	±	0.170524	0.276189	±	0.0588399	0.27619	±	0.00994398
11	3	1.21945	0.269609	0.287271	12.9372	9.92429	7.04383																									P-value
%macro AAA (measurement);																																Linear	0.315			0.0531			0.8357
Title &measurement;																																Quadratic	0.002			0.038			0.2461
Proc MIXED data = SRL noclprint covtest noitprint;																																Qubic	0.124			0.009			0.1144
	Class TRT Rep;
	model	&measurement = TRT/ddfm=kenrog;
	LSmeans TRT/pdiff adjust=tukey;
	CONTRAST 'Linear'		TRT	-0.372305	-0.332544	-0.292783	-0.213262	-0.133741	-0.054219	0.0253023	0.104824	0.263867	0.422909	0.581952	;
	CONTRAST 'Quadratic'		TRT	0.402747	0.275552	0.159964	-0.03639	-0.186312	-0.289804	-0.346864	-0.357494	-0.239462	0.0642927	0.553771	;
	CONTRAST 'Qubic'		TRT	-0.384237	-0.129325	0.0641903	0.290038	0.339317	0.258039	0.0922135	-0.112147	-0.45243	-0.394722	0.429064	;
	ods output diffs=ppp lsmeans=mmm;
	ods listing exclude diffs lsmeans;
run;
	%include 'c:\pdmix800.sas';
	%pdmix800(ppp,mmm,alpha=0.05,sort=no,lowercase=yes);
%mend AAA;
ods html body='temp.xls';
		%AAA(TN);	%AAA(NDIN);	%AAA(ADIN);	%AAA(TC);	%AAA(NDIC);	%AAA(ADIC);
Ods html close;
																TN	NDIN	ADIN		TC	NDIC	ADIC
TN											TN	Linear	0.315		Linear	0.315	0.0531	0.8357		<.0001	<.0001	<.0001
												Quadratic	0.0022		Quadratic	0.0022	0.038	0.2461		0.0054	<.0001	0.6137
The Mixed Procedure												Qubic	0.1244		Qubic	0.1244	0.0089	0.1144		0.653	0.0535	0.2651
Model Information
Data Set	WORK.SRL
Dependent Variable	TN
Covariance Structure	Diagonal
Estimation Method	REML
Residual Variance Method	Profile
Fixed Effects SE Method	Model-Based
Degrees of Freedom Method	Residual
Dimensions
Covariance Parameters	1
Columns in X	12
Columns in Z	0
Subjects	1
Max Obs per Subject	32
Number of Observations
Number of Observations Read	33
Number of Observations Used	32
Number of Observations Not Used	1
Covariance Parameter Estimates
Cov Parm	Estimate	Standard	Z Value	Pr > Z
		Error
Residual	0.04844	0.01495	3.24	0.0006
Fit Statistics
-2 Res Log Likelihood	7.7
AIC (Smaller is Better)	9.7
AICC (Smaller is Better)	9.9
BIC (Smaller is Better)	10.7
Type 3 Tests of Fixed Effects
Effect	Num DF	Den DF	F Value	Pr > F
TRT	10	21	1.63	0.1669
Contrasts
Label	Num DF	Den DF	F Value	Pr > F
Linear	1	21	1.06	0.315
Quadratic	1	21	12.18	0.0022
Qubic	1	21	2.56	0.1244
Least Squares Means
Effect	TRT	Estimate	Standard	DF	t Value	Pr > |t|
			Error
TRT	1	1.5923	0.1271	21	12.53	<.0001
TRT	2	1.4597	0.1271	21	11.49	<.0001
TRT	3	1.3656	0.1556	21	8.78	<.0001
TRT	4	1.2572	0.1271	21	9.89	<.0001
TRT	5	1.1071	0.1271	21	8.71	<.0001
TRT	6	1.1467	0.1271	21	9.02	<.0001
TRT	7	1.0672	0.1271	21	8.4	<.0001
TRT	8	1.1173	0.1271	21	8.79	<.0001
TRT	9	1.2579	0.1271	21	9.9	<.0001
TRT	10	1.3075	0.1271	21	10.29	<.0001
TRT	11	1.3641	0.1271	21	10.74	<.0001
Differences of Least Squares Means
Effect	TRT	_TRT	Estimate	Standard	DF	t Value	Pr > |t|	Adjustment	Adj P
				Error
TRT	1	2	0.1326	0.1797	21	0.74	0.4689	Tukey-Kramer	0.9994
TRT	1	3	0.2267	0.2009	21	1.13	0.2719	Tukey-Kramer	0.984
TRT	1	4	0.3351	0.1797	21	1.86	0.0762	Tukey-Kramer	0.7314
TRT	1	5	0.4852	0.1797	21	2.7	0.0134	Tukey-Kramer	0.2634
TRT	1	6	0.4456	0.1797	21	2.48	0.0217	Tukey-Kramer	0.3677
TRT	1	7	0.5251	0.1797	21	2.92	0.0081	Tukey-Kramer	0.1814
TRT	1	8	0.475	0.1797	21	2.64	0.0152	Tukey-Kramer	0.2881
TRT	1	9	0.3343	0.1797	21	1.86	0.0769	Tukey-Kramer	0.7339
TRT	1	10	0.2848	0.1797	21	1.58	0.1279	Tukey-Kramer	0.8719
TRT	1	11	0.2282	0.1797	21	1.27	0.218	Tukey-Kramer	0.9644
TRT	2	3	0.09413	0.2009	21	0.47	0.6442	Tukey-Kramer	1
TRT	2	4	0.2026	0.1797	21	1.13	0.2723	Tukey-Kramer	0.9841
TRT	2	5	0.3526	0.1797	21	1.96	0.0631	Tukey-Kramer	0.6738
TRT	2	6	0.3131	0.1797	21	1.74	0.0961	Tukey-Kramer	0.7986
TRT	2	7	0.3926	0.1797	21	2.18	0.0404	Tukey-Kramer	0.5373
TRT	2	8	0.3425	0.1797	21	1.91	0.0705	Tukey-Kramer	0.7077
TRT	2	9	0.2018	0.1797	21	1.12	0.2741	Tukey-Kramer	0.9845
TRT	2	10	0.1523	0.1797	21	0.85	0.4064	Tukey-Kramer	0.9982
TRT	2	11	0.09564	0.1797	21	0.53	0.6002	Tukey-Kramer	1
TRT	3	4	0.1084	0.2009	21	0.54	0.5951	Tukey-Kramer	1
TRT	3	5	0.2585	0.2009	21	1.29	0.2122	Tukey-Kramer	0.9613
TRT	3	6	0.2189	0.2009	21	1.09	0.2882	Tukey-Kramer	0.9875
TRT	3	7	0.2984	0.2009	21	1.49	0.1523	Tukey-Kramer	0.9091
TRT	3	8	0.2483	0.2009	21	1.24	0.2301	Tukey-Kramer	0.9702
TRT	3	9	0.1077	0.2009	21	0.54	0.5977	Tukey-Kramer	1
TRT	3	10	0.05812	0.2009	21	0.29	0.7752	Tukey-Kramer	1
TRT	3	11	0.001507	0.2009	21	0.01	0.9941	Tukey-Kramer	1
TRT	4	5	0.1501	0.1797	21	0.84	0.413	Tukey-Kramer	0.9984
TRT	4	6	0.1105	0.1797	21	0.61	0.5452	Tukey-Kramer	0.9999
TRT	4	7	0.19	0.1797	21	1.06	0.3024	Tukey-Kramer	0.9899
TRT	4	8	0.1399	0.1797	21	0.78	0.445	Tukey-Kramer	0.9991
TRT	4	9	-0.00078	0.1797	21	0	0.9966	Tukey-Kramer	1
TRT	4	10	-0.05032	0.1797	21	-0.28	0.7822	Tukey-Kramer	1
TRT	4	11	-0.1069	0.1797	21	-0.6	0.5582	Tukey-Kramer	0.9999
TRT	5	6	-0.03957	0.1797	21	-0.22	0.8278	Tukey-Kramer	1
TRT	5	7	0.03993	0.1797	21	0.22	0.8263	Tukey-Kramer	1
TRT	5	8	-0.01019	0.1797	21	-0.06	0.9553	Tukey-Kramer	1
TRT	5	9	-0.1509	0.1797	21	-0.84	0.4106	Tukey-Kramer	0.9983
TRT	5	10	-0.2004	0.1797	21	-1.12	0.2774	Tukey-Kramer	0.9852
TRT	5	11	-0.257	0.1797	21	-1.43	0.1674	Tukey-Kramer	0.9266
TRT	6	7	0.0795	0.1797	21	0.44	0.6627	Tukey-Kramer	1
TRT	6	8	0.02938	0.1797	21	0.16	0.8717	Tukey-Kramer	1
TRT	6	9	-0.1113	0.1797	21	-0.62	0.5424	Tukey-Kramer	0.9999
TRT	6	10	-0.1608	0.1797	21	-0.89	0.3809	Tukey-Kramer	0.9972
TRT	6	11	-0.2174	0.1797	21	-1.21	0.2397	Tukey-Kramer	0.9741
TRT	7	8	-0.05012	0.1797	21	-0.28	0.783	Tukey-Kramer	1
TRT	7	9	-0.1908	0.1797	21	-1.06	0.3004	Tukey-Kramer	0.9896
TRT	7	10	-0.2403	0.1797	21	-1.34	0.1954	Tukey-Kramer	0.9507
TRT	7	11	-0.2969	0.1797	21	-1.65	0.1133	Tukey-Kramer	0.8424
TRT	8	9	-0.1407	0.1797	21	-0.78	0.4425	Tukey-Kramer	0.9991
TRT	8	10	-0.1902	0.1797	21	-1.06	0.3019	Tukey-Kramer	0.9899
TRT	8	11	-0.2468	0.1797	21	-1.37	0.1841	Tukey-Kramer	0.9421
TRT	9	10	-0.04954	0.1797	21	-0.28	0.7855	Tukey-Kramer	1
TRT	9	11	-0.1061	0.1797	21	-0.59	0.561	Tukey-Kramer	0.9999
TRT	10	11	-0.05661	0.1797	21	-0.32	0.7558	Tukey-Kramer	1
TN
Effect=TRT Method=Tukey-Kramer(P<0.05) Set=1
OBS	TRT	Estimate	Standard Error	Letter
				Group
1	1	1.5923	0.1271	a
2	2	1.4597	0.1271	a
3	3	1.3656	0.1556	a
4	4	1.2572	0.1271	a
5	5	1.1071	0.1271	a
6	6	1.1467	0.1271	a
7	7	1.0672	0.1271	a
8	8	1.1173	0.1271	a
9	9	1.2579	0.1271	a
10	10	1.3075	0.1271	a
11	11	1.3641	0.1271	a
NDIN											NDIN	Linear	0.0531
												Quadratic	0.038
The Mixed Procedure												Qubic	0.0089
Model Information
Data Set	WORK.SRL
Dependent Variable	NDIN
Covariance Structure	Diagonal
Estimation Method	REML
Residual Variance Method	Profile
Fixed Effects SE Method	Model-Based
Degrees of Freedom Method	Residual
Dimensions
Covariance Parameters	1
Columns in X	12
Columns in Z	0
Subjects	1
Max Obs per Subject	31
Number of Observations
Number of Observations Read	33
Number of Observations Used	31
Number of Observations Not Used	2
Covariance Parameter Estimates
Cov Parm	Estimate	Standard	Z Value	Pr > Z
		Error
Residual	0.0125	0.003954	3.16	0.0008
Fit Statistics
-2 Res Log Likelihood	-19.9
AIC (Smaller is Better)	-17.9
AICC (Smaller is Better)	-17.7
BIC (Smaller is Better)	-16.9
Type 3 Tests of Fixed Effects
Effect	Num DF	Den DF	F Value	Pr > F
TRT	10	20	2.68	0.0291
Contrasts
Label	Num DF	Den DF	F Value	Pr > F
Linear	1	20	4.23	0.0531
Quadratic	1	20	4.94	0.038
Qubic	1	20	8.4	0.0089
Least Squares Means
Effect	TRT	Estimate	Standard	DF	t Value	Pr > |t|
			Error
TRT	1	0.6991	0.1118	20	6.25	<.0001
TRT	2	0.3301	0.06456	20	5.11	<.0001
TRT	3	0.1958	0.06456	20	3.03	0.0066
TRT	4	0.3465	0.06456	20	5.37	<.0001
TRT	5	0.1968	0.06456	20	3.05	0.0063
TRT	6	0.1569	0.06456	20	2.43	0.0246
TRT	7	0.3952	0.06456	20	6.12	<.0001
TRT	8	0.3082	0.06456	20	4.77	0.0001
TRT	9	0.2398	0.06456	20	3.71	0.0014
TRT	10	0.3144	0.06456	20	4.87	<.0001
TRT	11	0.2536	0.06456	20	3.93	0.0008
Differences of Least Squares Means
Effect	TRT	_TRT	Estimate	Standard	DF	t Value	Pr > |t|	Adjustment	Adj P
				Error
TRT	1	2	0.369	0.1291	20	2.86	0.0097	Tukey-Kramer	0.2056
TRT	1	3	0.5033	0.1291	20	3.9	0.0009	Tukey-Kramer	0.0278
TRT	1	4	0.3526	0.1291	20	2.73	0.0129	Tukey-Kramer	0.2535
TRT	1	5	0.5023	0.1291	20	3.89	0.0009	Tukey-Kramer	0.0282
TRT	1	6	0.5422	0.1291	20	4.2	0.0004	Tukey-Kramer	0.0147
TRT	1	7	0.3039	0.1291	20	2.35	0.0289	Tukey-Kramer	0.4382
TRT	1	8	0.3909	0.1291	20	3.03	0.0067	Tukey-Kramer	0.1533
TRT	1	9	0.4593	0.1291	20	3.56	0.002	Tukey-Kramer	0.0559
TRT	1	10	0.3847	0.1291	20	2.98	0.0074	Tukey-Kramer	0.1667
TRT	1	11	0.4455	0.1291	20	3.45	0.0025	Tukey-Kramer	0.069
TRT	2	3	0.1343	0.0913	20	1.47	0.157	Tukey-Kramer	0.9134
TRT	2	4	-0.01645	0.0913	20	-0.18	0.8589	Tukey-Kramer	1
TRT	2	5	0.1333	0.0913	20	1.46	0.1599	Tukey-Kramer	0.9169
TRT	2	6	0.1732	0.0913	20	1.9	0.0723	Tukey-Kramer	0.7124
TRT	2	7	-0.06506	0.0913	20	-0.71	0.4843	Tukey-Kramer	0.9996
TRT	2	8	0.02185	0.0913	20	0.24	0.8133	Tukey-Kramer	1
TRT	2	9	0.09028	0.0913	20	0.99	0.3346	Tukey-Kramer	0.9938
TRT	2	10	0.01573	0.0913	20	0.17	0.8649	Tukey-Kramer	1
TRT	2	11	0.07652	0.0913	20	0.84	0.4119	Tukey-Kramer	0.9983
TRT	3	4	-0.1507	0.0913	20	-1.65	0.1144	Tukey-Kramer	0.8425
TRT	3	5	-0.00098	0.0913	20	-0.01	0.9916	Tukey-Kramer	1
TRT	3	6	0.03896	0.0913	20	0.43	0.6741	Tukey-Kramer	1
TRT	3	7	-0.1993	0.0913	20	-2.18	0.0411	Tukey-Kramer	0.539
TRT	3	8	-0.1124	0.0913	20	-1.23	0.2325	Tukey-Kramer	0.9705
TRT	3	9	-0.04398	0.0913	20	-0.48	0.6352	Tukey-Kramer	1
TRT	3	10	-0.1185	0.0913	20	-1.3	0.209	Tukey-Kramer	0.9586
TRT	3	11	-0.05774	0.0913	20	-0.63	0.5343	Tukey-Kramer	0.9998
TRT	4	5	0.1497	0.0913	20	1.64	0.1166	Tukey-Kramer	0.8474
TRT	4	6	0.1897	0.0913	20	2.08	0.0509	Tukey-Kramer	0.6038
TRT	4	7	-0.04861	0.0913	20	-0.53	0.6003	Tukey-Kramer	1
TRT	4	8	0.0383	0.0913	20	0.42	0.6793	Tukey-Kramer	1
TRT	4	9	0.1067	0.0913	20	1.17	0.2562	Tukey-Kramer	0.9792
TRT	4	10	0.03218	0.0913	20	0.35	0.7282	Tukey-Kramer	1
TRT	4	11	0.09296	0.0913	20	1.02	0.3207	Tukey-Kramer	0.9922
TRT	5	6	0.03994	0.0913	20	0.44	0.6665	Tukey-Kramer	1
TRT	5	7	-0.1983	0.0913	20	-2.17	0.042	Tukey-Kramer	0.5456
TRT	5	8	-0.1114	0.0913	20	-1.22	0.2365	Tukey-Kramer	0.9722
TRT	5	9	-0.04301	0.0913	20	-0.47	0.6427	Tukey-Kramer	1
TRT	5	10	-0.1176	0.0913	20	-1.29	0.2126	Tukey-Kramer	0.9607
TRT	5	11	-0.05676	0.0913	20	-0.62	0.5411	Tukey-Kramer	0.9999
TRT	6	7	-0.2383	0.0913	20	-2.61	0.0168	Tukey-Kramer	0.3059
TRT	6	8	-0.1514	0.0913	20	-1.66	0.1129	Tukey-Kramer	0.8392
TRT	6	9	-0.08294	0.0913	20	-0.91	0.3744	Tukey-Kramer	0.9968
TRT	6	10	-0.1575	0.0913	20	-1.72	0.0999	Tukey-Kramer	0.8068
TRT	6	11	-0.0967	0.0913	20	-1.06	0.3021	Tukey-Kramer	0.9896
TRT	7	8	0.08691	0.0913	20	0.95	0.3525	Tukey-Kramer	0.9953
TRT	7	9	0.1553	0.0913	20	1.7	0.1044	Tukey-Kramer	0.8185
TRT	7	10	0.08079	0.0913	20	0.88	0.3867	Tukey-Kramer	0.9974
TRT	7	11	0.1416	0.0913	20	1.55	0.1366	Tukey-Kramer	0.8848
TRT	8	9	0.06842	0.0913	20	0.75	0.4623	Tukey-Kramer	0.9993
TRT	8	10	-0.00612	0.0913	20	-0.07	0.9472	Tukey-Kramer	1
TRT	8	11	0.05467	0.0913	20	0.6	0.556	Tukey-Kramer	0.9999
TRT	9	10	-0.07455	0.0913	20	-0.82	0.4238	Tukey-Kramer	0.9986
TRT	9	11	-0.01376	0.0913	20	-0.15	0.8817	Tukey-Kramer	1
TRT	10	11	0.06079	0.0913	20	0.67	0.5131	Tukey-Kramer	0.9998
NDIN
Effect=TRT Method=Tukey-Kramer(P<0.05) Set=1
OBS	TRT	Estimate	Standard Error	Letter
				Group
1	1	0.6991	0.1118	a
2	2	0.3301	0.06456	ab
3	3	0.1958	0.06456	b
4	4	0.3465	0.06456	ab
5	5	0.1968	0.06456	b
6	6	0.1569	0.06456	b
7	7	0.3952	0.06456	ab
8	8	0.3082	0.06456	ab
9	9	0.2398	0.06456	ab
10	10	0.3144	0.06456	ab
11	11	0.2536	0.06456	ab
ADIN											ADIN	Linear	0.8357
												Quadratic	0.2461
The Mixed Procedure												Qubic	0.1144
Model Information
Data Set	WORK.SRL
Dependent Variable	ADIN
Covariance Structure	Diagonal
Estimation Method	REML
Residual Variance Method	Profile
Fixed Effects SE Method	Model-Based
Degrees of Freedom Method	Residual
Dimensions
Covariance Parameters	1
Columns in X	12
Columns in Z	0
Subjects	1
Max Obs per Subject	31
Number of Observations
Number of Observations Read	33
Number of Observations Used	31
Number of Observations Not Used	2
Covariance Parameter Estimates
Cov Parm	Estimate	Standard	Z Value	Pr > Z
		Error
Residual	0.002669	0.000844	3.16	0.0008
Fit Statistics
-2 Res Log Likelihood	-50.8
AIC (Smaller is Better)	-48.8
AICC (Smaller is Better)	-48.6
BIC (Smaller is Better)	-47.8
Type 3 Tests of Fixed Effects
Effect	Num DF	Den DF	F Value	Pr > F
TRT	10	20	3.11	0.0148
Contrasts
Label	Num DF	Den DF	F Value	Pr > F
Linear	1	20	0.04	0.8357
Quadratic	1	20	1.43	0.2461
Qubic	1	20	2.73	0.1144
Least Squares Means
Effect	TRT	Estimate	Standard	DF	t Value	Pr > |t|
			Error
TRT	1	0.4028	0.05166	20	7.8	<.0001
TRT	2	0.248	0.02983	20	8.32	<.0001
TRT	3	0.2095	0.02983	20	7.02	<.0001
TRT	4	0.2348	0.02983	20	7.87	<.0001
TRT	5	0.269	0.02983	20	9.02	<.0001
TRT	6	0.3632	0.02983	20	12.18	<.0001
TRT	7	0.3462	0.02983	20	11.61	<.0001
TRT	8	0.3447	0.02983	20	11.56	<.0001
TRT	9	0.2908	0.02983	20	9.75	<.0001
TRT	10	0.2937	0.02983	20	9.85	<.0001
TRT	11	0.2762	0.02983	20	9.26	<.0001
Differences of Least Squares Means
Effect	TRT	_TRT	Estimate	Standard	DF	t Value	Pr > |t|	Adjustment	Adj P
				Error
TRT	1	2	0.1547	0.05965	20	2.59	0.0174	Tukey-Kramer	0.3134
TRT	1	3	0.1933	0.05965	20	3.24	0.0041	Tukey-Kramer	0.1036
TRT	1	4	0.168	0.05965	20	2.82	0.0107	Tukey-Kramer	0.2207
TRT	1	5	0.1337	0.05965	20	2.24	0.0365	Tukey-Kramer	0.5038
TRT	1	6	0.03957	0.05965	20	0.66	0.5147	Tukey-Kramer	0.9998
TRT	1	7	0.05655	0.05965	20	0.95	0.3544	Tukey-Kramer	0.9955
TRT	1	8	0.05801	0.05965	20	0.97	0.3424	Tukey-Kramer	0.9945
TRT	1	9	0.1119	0.05965	20	1.88	0.0753	Tukey-Kramer	0.7247
TRT	1	10	0.109	0.05965	20	1.83	0.0825	Tukey-Kramer	0.7519
TRT	1	11	0.1266	0.05965	20	2.12	0.0465	Tukey-Kramer	0.5766
TRT	2	3	0.03858	0.04218	20	0.91	0.3713	Tukey-Kramer	0.9966
TRT	2	4	0.01324	0.04218	20	0.31	0.7569	Tukey-Kramer	1
TRT	2	5	-0.02101	0.04218	20	-0.5	0.6239	Tukey-Kramer	1
TRT	2	6	-0.1152	0.04218	20	-2.73	0.0129	Tukey-Kramer	0.2537
TRT	2	7	-0.09817	0.04218	20	-2.33	0.0306	Tukey-Kramer	0.4534
TRT	2	8	-0.09671	0.04218	20	-2.29	0.0328	Tukey-Kramer	0.4736
TRT	2	9	-0.04281	0.04218	20	-1.02	0.3222	Tukey-Kramer	0.9924
TRT	2	10	-0.04568	0.04218	20	-1.08	0.2917	Tukey-Kramer	0.9878
TRT	2	11	-0.02815	0.04218	20	-0.67	0.5121	Tukey-Kramer	0.9998
TRT	3	4	-0.02534	0.04218	20	-0.6	0.5547	Tukey-Kramer	0.9999
TRT	3	5	-0.05958	0.04218	20	-1.41	0.1731	Tukey-Kramer	0.931
TRT	3	6	-0.1537	0.04218	20	-3.64	0.0016	Tukey-Kramer	0.0468
TRT	3	7	-0.1367	0.04218	20	-3.24	0.0041	Tukey-Kramer	0.1033
TRT	3	8	-0.1353	0.04218	20	-3.21	0.0044	Tukey-Kramer	0.1102
TRT	3	9	-0.08139	0.04218	20	-1.93	0.068	Tukey-Kramer	0.6934
TRT	3	10	-0.08425	0.04218	20	-2	0.0596	Tukey-Kramer	0.6526
TRT	3	11	-0.06673	0.04218	20	-1.58	0.1293	Tukey-Kramer	0.8723
TRT	4	5	-0.03424	0.04218	20	-0.81	0.4264	Tukey-Kramer	0.9987
TRT	4	6	-0.1284	0.04218	20	-3.04	0.0064	Tukey-Kramer	0.1488
TRT	4	7	-0.1114	0.04218	20	-2.64	0.0157	Tukey-Kramer	0.2916
TRT	4	8	-0.1099	0.04218	20	-2.61	0.0169	Tukey-Kramer	0.3074
TRT	4	9	-0.05605	0.04218	20	-1.33	0.1989	Tukey-Kramer	0.9521
TRT	4	10	-0.05891	0.04218	20	-1.4	0.1778	Tukey-Kramer	0.9354
TRT	4	11	-0.04139	0.04218	20	-0.98	0.3382	Tukey-Kramer	0.9941
TRT	5	6	-0.09415	0.04218	20	-2.23	0.0372	Tukey-Kramer	0.5096
TRT	5	7	-0.07716	0.04218	20	-1.83	0.0823	Tukey-Kramer	0.7512
TRT	5	8	-0.0757	0.04218	20	-1.79	0.0878	Tukey-Kramer	0.7702
TRT	5	9	-0.02181	0.04218	20	-0.52	0.6108	Tukey-Kramer	1
TRT	5	10	-0.02467	0.04218	20	-0.58	0.5651	Tukey-Kramer	0.9999
TRT	5	11	-0.00715	0.04218	20	-0.17	0.8671	Tukey-Kramer	1
TRT	6	7	0.01698	0.04218	20	0.4	0.6915	Tukey-Kramer	1
TRT	6	8	0.01845	0.04218	20	0.44	0.6666	Tukey-Kramer	1
TRT	6	9	0.07234	0.04218	20	1.72	0.1018	Tukey-Kramer	0.8117
TRT	6	10	0.06947	0.04218	20	1.65	0.1152	Tukey-Kramer	0.8442
TRT	6	11	0.087	0.04218	20	2.06	0.0524	Tukey-Kramer	0.6129
TRT	7	8	0.001464	0.04218	20	0.03	0.9727	Tukey-Kramer	1
TRT	7	9	0.05536	0.04218	20	1.31	0.2042	Tukey-Kramer	0.9557
TRT	7	10	0.05249	0.04218	20	1.24	0.2277	Tukey-Kramer	0.9684
TRT	7	11	0.07002	0.04218	20	1.66	0.1125	Tukey-Kramer	0.8383
TRT	8	9	0.05389	0.04218	20	1.28	0.216	Tukey-Kramer	0.9625
TRT	8	10	0.05103	0.04218	20	1.21	0.2405	Tukey-Kramer	0.9737
TRT	8	11	0.06855	0.04218	20	1.63	0.1198	Tukey-Kramer	0.854
TRT	9	10	-0.00286	0.04218	20	-0.07	0.9465	Tukey-Kramer	1
TRT	9	11	0.01466	0.04218	20	0.35	0.7318	Tukey-Kramer	1
TRT	10	11	0.01752	0.04218	20	0.42	0.6822	Tukey-Kramer	1
ADIN
Effect=TRT Method=Tukey-Kramer(P<0.05) Set=1
OBS	TRT	Estimate	Standard Error	Letter
				Group
1	1	0.4028	0.05166	ab
2	2	0.248	0.02983	ab
3	3	0.2095	0.02983	b
4	4	0.2348	0.02983	ab
5	5	0.269	0.02983	ab
6	6	0.3632	0.02983	a
7	7	0.3462	0.02983	ab
8	8	0.3447	0.02983	ab
9	9	0.2908	0.02983	ab
10	10	0.2937	0.02983	ab
11	11	0.2762	0.02983	ab
TC											TC	Linear	<.0001
												Quadratic	0.0054
The Mixed Procedure												Qubic	0.653
Model Information
Data Set	WORK.SRL
Dependent Variable	TC
Covariance Structure	Diagonal
Estimation Method	REML
Residual Variance Method	Profile
Fixed Effects SE Method	Model-Based
Degrees of Freedom Method	Residual
Dimensions
Covariance Parameters	1
Columns in X	12
Columns in Z	0
Subjects	1
Max Obs per Subject	31
Number of Observations
Number of Observations Read	33
Number of Observations Used	31
Number of Observations Not Used	2
Covariance Parameter Estimates
Cov Parm	Estimate	Standard	Z Value	Pr > Z
		Error
Residual	0.77	0.2435	3.16	0.0008
Fit Statistics
-2 Res Log Likelihood	62.8
AIC (Smaller is Better)	64.8
AICC (Smaller is Better)	65
BIC (Smaller is Better)	65.8
Type 3 Tests of Fixed Effects
Effect	Num DF	Den DF	F Value	Pr > F
TRT	10	20	5.66	0.0005
Contrasts
Label	Num DF	Den DF	F Value	Pr > F
Linear	1	20	27.63	<.0001
Quadratic	1	20	9.75	0.0054
Qubic	1	20	0.21	0.653
Least Squares Means
Effect	TRT	Estimate	Standard	DF	t Value	Pr > |t|
			Error
TRT	1	15.4278	0.5066	20	30.45	<.0001
TRT	2	14.0026	0.5066	20	27.64	<.0001
TRT	3	14.6107	0.5066	20	28.84	<.0001
TRT	4	15.0947	0.6205	20	24.33	<.0001
TRT	5	15.1413	0.6205	20	24.4	<.0001
TRT	6	12.4686	0.5066	20	24.61	<.0001
TRT	7	11.9309	0.5066	20	23.55	<.0001
TRT	8	12.534	0.5066	20	24.74	<.0001
TRT	9	13.1489	0.5066	20	25.95	<.0001
TRT	10	12.5662	0.5066	20	24.8	<.0001
TRT	11	12.8767	0.5066	20	25.42	<.0001
Differences of Least Squares Means
Effect	TRT	_TRT	Estimate	Standard	DF	t Value	Pr > |t|	Adjustment	Adj P
				Error
TRT	1	2	1.4252	0.7165	20	1.99	0.0605	Tukey-Kramer	0.6576
TRT	1	3	0.8171	0.7165	20	1.14	0.2676	Tukey-Kramer	0.9824
TRT	1	4	0.3331	0.801	20	0.42	0.682	Tukey-Kramer	1
TRT	1	5	0.2865	0.801	20	0.36	0.7243	Tukey-Kramer	1
TRT	1	6	2.9593	0.7165	20	4.13	0.0005	Tukey-Kramer	0.017
TRT	1	7	3.4969	0.7165	20	4.88	<.0001	Tukey-Kramer	0.0033
TRT	1	8	2.8939	0.7165	20	4.04	0.0006	Tukey-Kramer	0.0206
TRT	1	9	2.2789	0.7165	20	3.18	0.0047	Tukey-Kramer	0.1158
TRT	1	10	2.8616	0.7165	20	3.99	0.0007	Tukey-Kramer	0.0227
TRT	1	11	2.5511	0.7165	20	3.56	0.002	Tukey-Kramer	0.0555
TRT	2	3	-0.6082	0.7165	20	-0.85	0.406	Tukey-Kramer	0.9981
TRT	2	4	-1.0922	0.801	20	-1.36	0.1879	Tukey-Kramer	0.944
TRT	2	5	-1.1387	0.801	20	-1.42	0.1706	Tukey-Kramer	0.9285
TRT	2	6	1.534	0.7165	20	2.14	0.0448	Tukey-Kramer	0.5647
TRT	2	7	2.0717	0.7165	20	2.89	0.009	Tukey-Kramer	0.1942
TRT	2	8	1.4686	0.7165	20	2.05	0.0537	Tukey-Kramer	0.6207
TRT	2	9	0.8537	0.7165	20	1.19	0.2474	Tukey-Kramer	0.9763
TRT	2	10	1.4364	0.7165	20	2	0.0587	Tukey-Kramer	0.6482
TRT	2	11	1.1259	0.7165	20	1.57	0.1318	Tukey-Kramer	0.8766
TRT	3	4	-0.484	0.801	20	-0.6	0.5525	Tukey-Kramer	0.9999
TRT	3	5	-0.5306	0.801	20	-0.66	0.5153	Tukey-Kramer	0.9998
TRT	3	6	2.1422	0.7165	20	2.99	0.0072	Tukey-Kramer	0.1637
TRT	3	7	2.6798	0.7165	20	3.74	0.0013	Tukey-Kramer	0.0385
TRT	3	8	2.0768	0.7165	20	2.9	0.0089	Tukey-Kramer	0.1919
TRT	3	9	1.4618	0.7165	20	2.04	0.0547	Tukey-Kramer	0.6265
TRT	3	10	2.0445	0.7165	20	2.85	0.0098	Tukey-Kramer	0.2071
TRT	3	11	1.734	0.7165	20	2.42	0.0251	Tukey-Kramer	0.4015
TRT	4	5	-0.04656	0.8775	20	-0.05	0.9582	Tukey-Kramer	1
TRT	4	6	2.6262	0.801	20	3.28	0.0038	Tukey-Kramer	0.0964
TRT	4	7	3.1639	0.801	20	3.95	0.0008	Tukey-Kramer	0.0249
TRT	4	8	2.5608	0.801	20	3.2	0.0045	Tukey-Kramer	0.1124
TRT	4	9	1.9458	0.801	20	2.43	0.0247	Tukey-Kramer	0.3966
TRT	4	10	2.5285	0.801	20	3.16	0.005	Tukey-Kramer	0.1211
TRT	4	11	2.2181	0.801	20	2.77	0.0118	Tukey-Kramer	0.2382
TRT	5	6	2.6728	0.801	20	3.34	0.0033	Tukey-Kramer	0.0862
TRT	5	7	3.2104	0.801	20	4.01	0.0007	Tukey-Kramer	0.022
TRT	5	8	2.6073	0.801	20	3.26	0.004	Tukey-Kramer	0.1008
TRT	5	9	1.9924	0.801	20	2.49	0.0218	Tukey-Kramer	0.3659
TRT	5	10	2.5751	0.801	20	3.21	0.0043	Tukey-Kramer	0.1087
TRT	5	11	2.2646	0.801	20	2.83	0.0104	Tukey-Kramer	0.2165
TRT	6	7	0.5377	0.7165	20	0.75	0.4617	Tukey-Kramer	0.9993
TRT	6	8	-0.0654	0.7165	20	-0.09	0.9282	Tukey-Kramer	1
TRT	6	9	-0.6804	0.7165	20	-0.95	0.3536	Tukey-Kramer	0.9954
TRT	6	10	-0.09764	0.7165	20	-0.14	0.893	Tukey-Kramer	1
TRT	6	11	-0.4081	0.7165	20	-0.57	0.5752	Tukey-Kramer	0.9999
TRT	7	8	-0.6031	0.7165	20	-0.84	0.4099	Tukey-Kramer	0.9983
TRT	7	9	-1.218	0.7165	20	-1.7	0.1046	Tukey-Kramer	0.8191
TRT	7	10	-0.6353	0.7165	20	-0.89	0.3858	Tukey-Kramer	0.9973
TRT	7	11	-0.9458	0.7165	20	-1.32	0.2017	Tukey-Kramer	0.954
TRT	8	9	-0.615	0.7165	20	-0.86	0.4009	Tukey-Kramer	0.998
TRT	8	10	-0.03224	0.7165	20	-0.04	0.9646	Tukey-Kramer	1
TRT	8	11	-0.3427	0.7165	20	-0.48	0.6376	Tukey-Kramer	1
TRT	9	10	0.5827	0.7165	20	0.81	0.4256	Tukey-Kramer	0.9987
TRT	9	11	0.2722	0.7165	20	0.38	0.708	Tukey-Kramer	1
TRT	10	11	-0.3105	0.7165	20	-0.43	0.6694	Tukey-Kramer	1
TC
Effect=TRT Method=Tukey-Kramer(P<0.05) Set=1
OBS	TRT	Estimate	Standard Error	Letter Group
1	1	15.4278	0.5066	a
2	2	14.0026	0.5066	abc
3	3	14.6107	0.5066	ab
4	4	15.0947	0.6205	ab
5	5	15.1413	0.6205	ab
6	6	12.4686	0.5066	bc
7	7	11.9309	0.5066	c
8	8	12.534	0.5066	bc
9	9	13.1489	0.5066	abc
10	10	12.5662	0.5066	bc
11	11	12.8767	0.5066	abc
NDIC											NDIC	Linear	<.0001
												Quadratic	<.0001
The Mixed Procedure												Qubic	0.0535
Model Information
Data Set	WORK.SRL
Dependent Variable	NDIC
Covariance Structure	Diagonal
Estimation Method	REML
Residual Variance Method	Profile
Fixed Effects SE Method	Model-Based
Degrees of Freedom Method	Residual
Dimensions
Covariance Parameters	1
Columns in X	12
Columns in Z	0
Subjects	1
Max Obs per Subject	33
Number of Observations
Number of Observations Read	33
Number of Observations Used	33
Number of Observations Not Used	0
Covariance Parameter Estimates
Cov Parm	Estimate	Standard	Z Value	Pr > Z
		Error
Residual	0.8662	0.2612	3.32	0.0005
Fit Statistics
-2 Res Log Likelihood	71.4
AIC (Smaller is Better)	73.4
AICC (Smaller is Better)	73.6
BIC (Smaller is Better)	74.4
Type 3 Tests of Fixed Effects
Effect	Num DF	Den DF	F Value	Pr > F
TRT	10	22	24.78	<.0001
Contrasts
Label	Num DF	Den DF	F Value	Pr > F
Linear	1	22	157.69	<.0001
Quadratic	1	22	28.76	<.0001
Qubic	1	22	4.16	0.0535
Least Squares Means
Effect	TRT	Estimate	Standard	DF	t Value	Pr > |t|
			Error
TRT	1	18.834	0.5373	22	35.05	<.0001
TRT	2	14.3646	0.5373	22	26.73	<.0001
TRT	3	12.2047	0.5373	22	22.71	<.0001
TRT	4	13.7636	0.5373	22	25.61	<.0001
TRT	5	14.0638	0.5373	22	26.17	<.0001
TRT	6	11.7214	0.5373	22	21.81	<.0001
TRT	7	11.264	0.5373	22	20.96	<.0001
TRT	8	10.6077	0.5373	22	19.74	<.0001
TRT	9	10.3114	0.5373	22	19.19	<.0001
TRT	10	10.0391	0.5373	22	18.68	<.0001
TRT	11	9.7995	0.5373	22	18.24	<.0001
Differences of Least Squares Means
Effect	TRT	_TRT	Estimate	Standard	DF	t Value	Pr > |t|	Adjustment	Adj P
				Error
TRT	1	2	4.4694	0.7599	22	5.88	<.0001	Tukey	0.0003
TRT	1	3	6.6293	0.7599	22	8.72	<.0001	Tukey	<.0001
TRT	1	4	5.0703	0.7599	22	6.67	<.0001	Tukey	<.0001
TRT	1	5	4.7702	0.7599	22	6.28	<.0001	Tukey	0.0001
TRT	1	6	7.1125	0.7599	22	9.36	<.0001	Tukey	<.0001
TRT	1	7	7.5699	0.7599	22	9.96	<.0001	Tukey	<.0001
TRT	1	8	8.2263	0.7599	22	10.83	<.0001	Tukey	<.0001
TRT	1	9	8.5226	0.7599	22	11.22	<.0001	Tukey	<.0001
TRT	1	10	8.7949	0.7599	22	11.57	<.0001	Tukey	<.0001
TRT	1	11	9.0344	0.7599	22	11.89	<.0001	Tukey	<.0001
TRT	2	3	2.1599	0.7599	22	2.84	0.0095	Tukey	0.2057
TRT	2	4	0.6009	0.7599	22	0.79	0.4375	Tukey	0.999
TRT	2	5	0.3008	0.7599	22	0.4	0.696	Tukey	1
TRT	2	6	2.6432	0.7599	22	3.48	0.0021	Tukey	0.0611
TRT	2	7	3.1005	0.7599	22	4.08	0.0005	Tukey	0.0167
TRT	2	8	3.7569	0.7599	22	4.94	<.0001	Tukey	0.0023
TRT	2	9	4.0532	0.7599	22	5.33	<.0001	Tukey	0.001
TRT	2	10	4.3255	0.7599	22	5.69	<.0001	Tukey	0.0004
TRT	2	11	4.5651	0.7599	22	6.01	<.0001	Tukey	0.0002
TRT	3	4	-1.559	0.7599	22	-2.05	0.0523	Tukey	0.6191
TRT	3	5	-1.8591	0.7599	22	-2.45	0.0229	Tukey	0.3836
TRT	3	6	0.4833	0.7599	22	0.64	0.5314	Tukey	0.9998
TRT	3	7	0.9407	0.7599	22	1.24	0.2288	Tukey	0.9702
TRT	3	8	1.597	0.7599	22	2.1	0.0473	Tukey	0.5879
TRT	3	9	1.8933	0.7599	22	2.49	0.0207	Tukey	0.3597
TRT	3	10	2.1656	0.7599	22	2.85	0.0093	Tukey	0.203
TRT	3	11	2.4052	0.7599	22	3.17	0.0045	Tukey	0.114
TRT	4	5	-0.3001	0.7599	22	-0.39	0.6967	Tukey	1
TRT	4	6	2.0422	0.7599	22	2.69	0.0135	Tukey	0.2664
TRT	4	7	2.4996	0.7599	22	3.29	0.0033	Tukey	0.0895
TRT	4	8	3.156	0.7599	22	4.15	0.0004	Tukey	0.0142
TRT	4	9	3.4523	0.7599	22	4.54	0.0002	Tukey	0.0059
TRT	4	10	3.7246	0.7599	22	4.9	<.0001	Tukey	0.0026
TRT	4	11	3.9641	0.7599	22	5.22	<.0001	Tukey	0.0013
TRT	5	6	2.3423	0.7599	22	3.08	0.0054	Tukey	0.1334
TRT	5	7	2.7997	0.7599	22	3.68	0.0013	Tukey	0.0397
TRT	5	8	3.4561	0.7599	22	4.55	0.0002	Tukey	0.0058
TRT	5	9	3.7524	0.7599	22	4.94	<.0001	Tukey	0.0024
TRT	5	10	4.0247	0.7599	22	5.3	<.0001	Tukey	0.001
TRT	5	11	4.2642	0.7599	22	5.61	<.0001	Tukey	0.0005
TRT	6	7	0.4574	0.7599	22	0.6	0.5534	Tukey	0.9999
TRT	6	8	1.1138	0.7599	22	1.47	0.1569	Tukey	0.9163
TRT	6	9	1.41	0.7599	22	1.86	0.077	Tukey	0.7371
TRT	6	10	1.6823	0.7599	22	2.21	0.0375	Tukey	0.5185
TRT	6	11	1.9219	0.7599	22	2.53	0.0191	Tukey	0.3404
TRT	7	8	0.6564	0.7599	22	0.86	0.397	Tukey	0.9979
TRT	7	9	0.9527	0.7599	22	1.25	0.2231	Tukey	0.9676
TRT	7	10	1.225	0.7599	22	1.61	0.1212	Tukey	0.8611
TRT	7	11	1.4645	0.7599	22	1.93	0.067	Tukey	0.6951
TRT	8	9	0.2963	0.7599	22	0.39	0.7004	Tukey	1
TRT	8	10	0.5686	0.7599	22	0.75	0.4623	Tukey	0.9994
TRT	8	11	0.8081	0.7599	22	1.06	0.2991	Tukey	0.9897
TRT	9	10	0.2723	0.7599	22	0.36	0.7235	Tukey	1
TRT	9	11	0.5119	0.7599	22	0.67	0.5076	Tukey	0.9998
TRT	10	11	0.2396	0.7599	22	0.32	0.7555	Tukey	1
NDIC
Effect=TRT Method=Tukey(P<0.05) Set=1
OBS	TRT	Estimate	Standard Error	Letter Group
1	1	18.834	0.5373	a
2	2	14.3646	0.5373	b
3	3	12.2047	0.5373	bcd
4	4	13.7636	0.5373	bc
5	5	14.0638	0.5373	b
6	6	11.7214	0.5373	bcd
7	7	11.264	0.5373	cd
8	8	10.6077	0.5373	d
9	9	10.3114	0.5373	d
10	10	10.0391	0.5373	d
11	11	9.7995	0.5373	d
ADIC											ADIC	Linear	<.0001
												Quadratic	0.6137
The Mixed Procedure												Qubic	0.2651
Model Information
Data Set	WORK.SRL
Dependent Variable	ADIC
Covariance Structure	Diagonal
Estimation Method	REML
Residual Variance Method	Profile
Fixed Effects SE Method	Model-Based
Degrees of Freedom Method	Residual
Dimensions
Covariance Parameters	1
Columns in X	12
Columns in Z	0
Subjects	1
Max Obs per Subject	33
Number of Observations
Number of Observations Read	33
Number of Observations Used	33
Number of Observations Not Used	0
Covariance Parameter Estimates
Cov Parm	Estimate	Standard	Z Value	Pr > Z
		Error
Residual	0.5374	0.162	3.32	0.0005
Fit Statistics
-2 Res Log Likelihood	60.9
AIC (Smaller is Better)	62.9
AICC (Smaller is Better)	63.1
BIC (Smaller is Better)	63.9
Type 3 Tests of Fixed Effects
Effect	Num DF	Den DF	F Value	Pr > F
TRT	10	22	17.44	<.0001
Contrasts
Label	Num DF	Den DF	F Value	Pr > F
Linear	1	22	83.79	<.0001
Quadratic	1	22	0.26	0.6137
Qubic	1	22	1.31	0.2651
Least Squares Means
Effect	TRT	Estimate	Standard	DF	t Value	Pr > |t|
			Error
TRT	1	13.5323	0.4233	22	31.97	<.0001
TRT	2	8.9379	0.4233	22	21.12	<.0001
TRT	3	8.8159	0.4233	22	20.83	<.0001
TRT	4	9.8721	0.4233	22	23.32	<.0001
TRT	5	9.6656	0.4233	22	22.84	<.0001
TRT	6	10.1373	0.4233	22	23.95	<.0001
TRT	7	10.7633	0.4233	22	25.43	<.0001
TRT	8	9.052	0.4233	22	21.39	<.0001
TRT	9	8.2074	0.4233	22	19.39	<.0001
TRT	10	7.1948	0.4233	22	17	<.0001
TRT	11	7.2778	0.4233	22	17.19	<.0001
Differences of Least Squares Means
Effect	TRT	_TRT	Estimate	Standard	DF	t Value	Pr > |t|	Adjustment	Adj P
				Error
TRT	1	2	4.5944	0.5986	22	7.68	<.0001	Tukey	<.0001
TRT	1	3	4.7164	0.5986	22	7.88	<.0001	Tukey	<.0001
TRT	1	4	3.6602	0.5986	22	6.11	<.0001	Tukey	0.0002
TRT	1	5	3.8667	0.5986	22	6.46	<.0001	Tukey	<.0001
TRT	1	6	3.395	0.5986	22	5.67	<.0001	Tukey	0.0004
TRT	1	7	2.769	0.5986	22	4.63	0.0001	Tukey	0.0049
TRT	1	8	4.4804	0.5986	22	7.49	<.0001	Tukey	<.0001
TRT	1	9	5.3249	0.5986	22	8.9	<.0001	Tukey	<.0001
TRT	1	10	6.3376	0.5986	22	10.59	<.0001	Tukey	<.0001
TRT	1	11	6.2545	0.5986	22	10.45	<.0001	Tukey	<.0001
TRT	2	3	0.122	0.5986	22	0.2	0.8404	Tukey	1
TRT	2	4	-0.9342	0.5986	22	-1.56	0.1329	Tukey	0.8823
TRT	2	5	-0.7277	0.5986	22	-1.22	0.237	Tukey	0.9736
TRT	2	6	-1.1994	0.5986	22	-2	0.0576	Tukey	0.6486
TRT	2	7	-1.8254	0.5986	22	-3.05	0.0059	Tukey	0.1418
TRT	2	8	-0.1141	0.5986	22	-0.19	0.8506	Tukey	1
TRT	2	9	0.7305	0.5986	22	1.22	0.2353	Tukey	0.9729
TRT	2	10	1.7432	0.5986	22	2.91	0.0081	Tukey	0.182
TRT	2	11	1.6601	0.5986	22	2.77	0.0111	Tukey	0.2312
TRT	3	4	-1.0562	0.5986	22	-1.76	0.0915	Tukey	0.7874
TRT	3	5	-0.8497	0.5986	22	-1.42	0.1697	Tukey	0.9303
TRT	3	6	-1.3214	0.5986	22	-2.21	0.038	Tukey	0.5223
TRT	3	7	-1.9475	0.5986	22	-3.25	0.0036	Tukey	0.096
TRT	3	8	-0.2361	0.5986	22	-0.39	0.6971	Tukey	1
TRT	3	9	0.6085	0.5986	22	1.02	0.3204	Tukey	0.9926
TRT	3	10	1.6211	0.5986	22	2.71	0.0128	Tukey	0.2575
TRT	3	11	1.5381	0.5986	22	2.57	0.0175	Tukey	0.3203
TRT	4	5	0.2065	0.5986	22	0.34	0.7334	Tukey	1
TRT	4	6	-0.2652	0.5986	22	-0.44	0.6621	Tukey	1
TRT	4	7	-0.8912	0.5986	22	-1.49	0.1507	Tukey	0.9086
TRT	4	8	0.8202	0.5986	22	1.37	0.1844	Tukey	0.9435
TRT	4	9	1.6647	0.5986	22	2.78	0.0109	Tukey	0.2283
TRT	4	10	2.6774	0.5986	22	4.47	0.0002	Tukey	0.0069
TRT	4	11	2.5943	0.5986	22	4.33	0.0003	Tukey	0.0095
TRT	5	6	-0.4717	0.5986	22	-0.79	0.4391	Tukey	0.999
TRT	5	7	-1.0977	0.5986	22	-1.83	0.0802	Tukey	0.7494
TRT	5	8	0.6137	0.5986	22	1.03	0.3164	Tukey	0.9921
TRT	5	9	1.4582	0.5986	22	2.44	0.0234	Tukey	0.3892
TRT	5	10	2.4709	0.5986	22	4.13	0.0004	Tukey	0.015
TRT	5	11	2.3878	0.5986	22	3.99	0.0006	Tukey	0.0205
TRT	6	7	-0.626	0.5986	22	-1.05	0.307	Tukey	0.9909
TRT	6	8	1.0853	0.5986	22	1.81	0.0835	Tukey	0.761
TRT	6	9	1.9299	0.5986	22	3.22	0.0039	Tukey	0.1017
TRT	6	10	2.9426	0.5986	22	4.92	<.0001	Tukey	0.0025
TRT	6	11	2.8595	0.5986	22	4.78	<.0001	Tukey	0.0034
TRT	7	8	1.7114	0.5986	22	2.86	0.0091	Tukey	0.1997
TRT	7	9	2.5559	0.5986	22	4.27	0.0003	Tukey	0.0109
TRT	7	10	3.5686	0.5986	22	5.96	<.0001	Tukey	0.0002
TRT	7	11	3.4855	0.5986	22	5.82	<.0001	Tukey	0.0003
TRT	8	9	0.8445	0.5986	22	1.41	0.1723	Tukey	0.9327
TRT	8	10	1.8572	0.5986	22	3.1	0.0052	Tukey	0.1284
TRT	8	11	1.7741	0.5986	22	2.96	0.0072	Tukey	0.1659
TRT	9	10	1.0127	0.5986	22	1.69	0.1048	Tukey	0.8244
TRT	9	11	0.9296	0.5986	22	1.55	0.1347	Tukey	0.8853
TRT	10	11	-0.08306	0.5986	22	-0.14	0.8909	Tukey	1
ADIC
Effect=TRT Method=Tukey(P<0.05) Set=1
OBS	TRT	Estimate	Standard Error	Letter Group
1	1	13.5323	0.4233	a
2	2	8.9379	0.4233	bcd
3	3	8.8159	0.4233	bcd
4	4	9.8721	0.4233	bc
5	5	9.6656	0.4233	bc
6	6	10.1373	0.4233	bc
7	7	10.7633	0.4233	b
8	8	9.052	0.4233	bcd
9	9	8.2074	0.4233	cd
10	10	7.1948	0.4233	d
11	11	7.2778	0.4233	d
9	9	9.3819	1.0816	a
10	10	9.3024	1.0816	a
11	11	8.562	1.0816	a
